# The apparent requirement for protein synthesis during G2 phase is due to checkpoint activation

Sarah Lockhead<sup>1,\*</sup>, Alisa Moskaleva<sup>1,\*</sup>, Julia Kamenz<sup>1,\*†</sup>, Yuxin Chen<sup>1</sup>, Minjung Kang<sup>1</sup>, Anay Reddy<sup>1,3</sup>, Silvia Santos<sup>4</sup>, and James E. Ferrell, Jr.<sup>1,2,†</sup>

<sup>1</sup>*Department of Chemical and Systems Biology, Stanford University School of Medicine, Stanford, CA 94305-5174, USA*

<sup>2</sup>*Department of Biochemistry, Stanford University School of Medicine, Stanford, CA 94305-5307, USA*

<sup>3</sup>*Current address: Howard Hughes Medical Institute, Department of Biology, Stanford University School of Medicine, Stanford, CA 94305, USA*

<sup>4</sup>*Quantitative Cell Biology Laboratory, The Francis Crick Institute, London, UK*

\*These authors contributed equally.

†Correspondence: [jkamenz@stanford.edu](mailto:jkamenz@stanford.edu) or [james.ferrell@stanford.edu](mailto:james.ferrell@stanford.edu)

## 1 **Abstract**

2 Protein synthesis inhibitors (e.g. cycloheximide) prevent cells from entering mitosis,  
3 suggesting that cell cycle progression requires protein synthesis until right before mitotic  
4 entry. However, cycloheximide is also known to activate p38 MAPK, which can delay  
5 mitotic entry through a G2/M checkpoint. Here we asked whether checkpoint activation  
6 or a requirement for protein synthesis is responsible for the cycloheximide effect. We  
7 found that p38 inhibitors prevent cycloheximide-treated cells from arresting in G2 phase,  
8 and that G2 duration is normal in about half of these cells. The Wee1/Myt1 inhibitor  
9 PD0166285 also prevents cycloheximide from blocking mitotic entry, raising the  
10 possibility that Wee1 and/or Myt1 mediate the cycloheximide-induced G2 arrest. Thus,  
11 the ultimate trigger for mitotic entry appears not to be the continued synthesis of mitotic  
12 cyclins or other proteins. However, M-phase progression was delayed in cycloheximide-  
13 plus-kinase-inhibitor-treated cells, emphasizing the different requirements of protein  
14 synthesis for timely entry and completion of mitosis.

15

## 16 **Impact statement (30 words):**

17 Cycloheximide arrests cells in G2 phase due to activation of p38 MAPK, not inhibition of  
18 protein synthesis, arguing that protein synthesis in G2 phase is not required for mitotic  
19 entry.

## 20 Introduction

21 Early studies on human cells in tissue culture as well as cells in the intestinal crypt of rats  
22 demonstrated that protein synthesis inhibitors like cycloheximide and puromycin prevent  
23 cells from entering mitosis, unless the cells were already in late G2 phase at the time of  
24 treatment (1, 2). The discovery of mitotic cyclins, activators of the cyclin-dependent  
25 kinases (Cdk), that accumulate prior to mitosis, provided a plausible explanation for these  
26 observations (3-5). Indeed, supplementing a cycloheximide-arrested *Xenopus* egg  
27 extract with exogenous cyclin B is sufficient to promote mitotic progression (6), as is  
28 supplementing an RNase-treated extract with cyclin B mRNA (7), and blocking the  
29 synthesis of cyclin B1 and B2 prevents mitotic entry (8). This argues that the synthesis of  
30 this particular protein is of singular importance for M-phase initiation.

31 In human cells, mitotic cyclins, mainly cyclins A2, B1, and B2, start to accumulate around  
32 the time of the G1/S transition as a result of the activation of cyclin transcription by E2F-  
33 family transcription factors (9) and stabilization of the cyclin proteins via APC/C<sup>Cdh1</sup>  
34 inactivation (10). At the end of S phase, the ATR-mediated DNA replication checkpoint is  
35 turned off, and a FOXM1-mediated transcriptional circuit is activated (11). At about the  
36 same time, the pace of cyclin B1 accumulation (12-16), as well as the accumulation of  
37 other pro-mitotic regulators, including Plk1, Bora, and Aurora A, increases (12, 17, 18).  
38 These changes in transcription and protein abundances are thought to culminate in the  
39 activation of mitotic kinases, especially Cdk1, and the inactivation of the counteracting  
40 phosphatases PP1 and PP2A-B55 (19, 20). Cdk1 activity – judged by substrate  
41 phosphorylation – rises throughout G2 phase (12, 21) and sharply increases towards the

42 end of G2 phase (12, 22). Cdk1-cyclin B1 then translocates from the cytoplasm to the  
43 nucleus just prior to nuclear envelope breakdown (16, 23-26).

44 The final increase in cyclin B1-Cdk1 activity, and decrease in PP2A-B55 activity, is  
45 thought to be due to the flipping of two bistable switches. Two feedback loops, a double-  
46 negative feedback loop involving the Cdk1-inhibitory kinases Wee1/Myt1 and a positive  
47 feedback loop involving the Cdk1-activating phosphatase Cdc25, keep Cdk1 activity low  
48 until cyclin B1 has reached a threshold concentration, beyond which the system switches  
49 from low to high Cdk1 activity, and high to low Wee1/Myt1 activity (Figure 1) (27-29). At  
50 the same time, a double negative feedback loop centered on PP2A-B55 flips and leads  
51 to an abrupt decrease of PP2A-B55 activity (30-34).

52 The cyclin B1 threshold concentration is determined by the amounts of Cdc25 and  
53 Wee1/Myt1 activity present (35). In somatic cells, several signaling pathways impinge  
54 upon Cdc25 and/or Wee1 to delay the G2-to-M transition in the face of stresses (36).  
55 These include the ATM/ATR kinases, which activate Chk1 and Chk2, which in turn can  
56 inactivate Cdc25 and activate Wee1 by phosphorylating 14-3-3 binding sites in the two  
57 Cdk1 regulators. These pathways play a role in delaying mitosis in the presence of DNA  
58 damage, and may also help prevent premature mitosis in cells undergoing normal DNA  
59 replication (36-38). In addition, a protein kinase cascade that includes the MKK3 and  
60 MKK6 MAP kinase kinases, p38 MAPK, and the downstream kinase MAPKAP kinase 2  
61 (MK2), has been implicated in the negative regulation of Cdc25, by phosphorylating the  
62 same 14-3-3 binding site (39). Interestingly, p38 activation has been observed in  
63 response to protein synthesis stresses, including cycloheximide (40); indeed

64 cycloheximide is often used as a positive control for maximal activation of p38. These  
65 findings raise the question of whether the cycloheximide-dependent G2 delay is indeed  
66 caused by blocking the synthesis of proteins required for mitotic entry, or rather activation  
67 of the p38-dependent G2/M checkpoint.

68 Here we used live-cell markers of cell cycle progression combined with small molecule  
69 inhibitors to dissect the contribution of protein synthesis to G2 and mitotic progression.  
70 We show that inhibition of Wee1/Myt1 shortens the duration of G2 phase in a dose-  
71 dependent manner, and allows cells to progress into mitosis in the presence of  
72 cycloheximide. Moreover, p38 inhibition overcomes a cycloheximide-induced G2 arrest,  
73 arguing that p38-mediated checkpoint activation causes the arrest and not insufficient  
74 protein synthesis. However, although G2 protein synthesis was not required for mitotic  
75 entry, it was required for normal mitotic progression. These findings suggest that the burst  
76 of cyclin synthesis that normally occurs during G2 phase serves as a “just-in-time”  
77 preparation for mitotic progression, but does not trigger mitotic entry.

## 78 **Results**

79 We chose MCF10A cells, a spontaneously immortalized human mammary epithelial cell  
80 line, for these studies, because they are euploid, non-tumorigenic, and have been studied  
81 extensively (41, 42). To determine when S phase ends and G2 phase begins, we stably  
82 expressed an eYFP-PCNA fusion protein, a live-cell marker of DNA replication (43, 44).  
83 eYFP-PCNA forms bright foci within the nucleus during S phase, which become brighter  
84 and less numerous as S phase progresses (Figure 2A,B). We verified that eYFP-PCNA  
85 foci co-localized with BrdU and EdU-staining sites of active DNA, as previously reported

86 (44). At the end of S phase, eYFP-PCNA foci dissolve and fluorescence becomes diffuse,  
87 marking the S/G2 transition (Figure 2B). Upon nuclear envelope breakdown (NEB),  
88 nuclear eYFP-PCNA disperses throughout the cell; this can be taken as a marker for the  
89 G2/M transition (or, more precisely, of the prophase/prometaphase transition; Figure 2A).  
90 Thus eYFP-PCNA proved to be well suited to measure G2 duration, from the time of G2  
91 onset (the disappearance of foci) to the time of G2 termination (taken as the time when  
92 eYFP-PCNA exited the nucleus due to NEB). Typical mean G2 durations were about 4 h  
93 with a variance of 25%, within the range of previously reported durations for G2 phase in  
94 a variety of cell lines (12, 43, 45-48).

95

#### 96 **Live-cell imaging confirms that cycloheximide blocks entry into mitosis.**

97 Early studies on fixed cells showed that the protein synthesis inhibitors puromycin and  
98 cycloheximide cause cells to arrest in G2 phase (1, 2). We confirmed this finding by live-  
99 cell microscopy using the PCNA probe to demarcate G2 phase. We followed  
100 asynchronously growing cells in cell culture for 4-6 h, then added cycloheximide (10  
101  $\mu\text{g/ml}$ ) and continued to follow the cells for another 6-10 h (Figure 3A). This allowed us to  
102 identify cells which had exited S phase during the initial imaging period, determine  
103 accurately how much time these cells had spent in G2 phase prior to drug addition, and  
104 finally determine the fate of these cells in response to the drug treatment. Because many  
105 of our subsequent experiments required the addition of DMSO-solubilized drugs to a final  
106 DMSO concentration of 0.1%, we performed all experiments in the presence of this  
107 concentration of DMSO.

108 Cells treated with DMSO alone progressed into mitosis (130 out of 130 cells), but  
109 cycloheximide addition arrested the large majority of cells (153 cells out of 165) in G2  
110 phase (Figures 3B-D). Cycloheximide-treated cells were more likely to progress into  
111 mitosis if the drug was added late in G2 phase. Of the 12 cycloheximide-treated cells that  
112 did enter mitosis, 10 had spent more than 3 h in G2 phase (>75% of the duration of a  
113 normal G2 phase) at the time of cycloheximide addition (Figure 3C,D). Based on logistic  
114 regression analysis, the probability that a cycloheximide-treated cell will enter mitosis if  
115 the cycloheximide is added 2 h after the start of G2 phase is 1% (with a 95% confidence  
116 interval (CI) of 0 to 7%); if added 3 h after the start of G2 phase, it rises to 4% (95% CI 1  
117 to 11%); and if it is added 4 h after the start of G2 phase, the duration of a typical normal  
118 G2 phase, the probability is 19 (95% CI 6 to 45%) (Figure 3E). The fraction of mitotic cells  
119 in the cell population (mitotic index) remained approximately constant throughout the  
120 experiment for the DMSO-treated population, but decreased to near-zero within 60 min  
121 after cycloheximide treatment (Figure 3F). Together, these findings confirm that  
122 cycloheximide-treated G2 cells do arrest, as previously noted (1, 2), and imply that cells  
123 remain sensitive to cycloheximide treatment until late in G2 phase.

124

125 **Wee1/Myt1 inhibition shortens G2 phase and restores mitotic entry in**  
126 **cycloheximide-treated G2 phase cells.**

127 The Wee1/Myt1 kinases are key regulators of the G2/M transition that, when active,  
128 restrain Cdk1-cyclin B activity. FRET studies have indicated that Cdk1 activation begins  
129 just prior to the nuclear translocation of Cdk1-cyclin B1—thus very late in G2 phase—

130 which suggests that Wee1 and Myt1 may be on during almost all of G2 phase (22, 49).  
131 However, other studies have suggested that some Cdk1 activation can be detected early  
132 in G2 phase (12), which could mean that Wee1/Myt1 is switched off earlier. These  
133 possibilities can be distinguished by determining how much the duration of G2 phase can  
134 be shortened by Wee1/Myt1 inhibition. In the former case, the minimal duration of G2  
135 phase would be near zero; in the latter case it would be longer, with the minimal duration  
136 of G2 phase corresponding to how long the interval normally is between the inactivation  
137 of Wee1/Myt1 and the onset of M phase.

138 To inhibit Wee1/Myt1 activity we used the small molecule inhibitor PD0166285 (50).  
139 Treating an asynchronously growing cell culture with different concentrations of  
140 PD0166285 reduced the Wee1-mediated phosphorylation of Cdk1 at Tyr 15 in a dose-  
141 dependent manner (Figure 4A).

142 We next investigated the impact of Wee1/Myt1 inhibition on the duration of G2 phase by  
143 live-cell imaging. Cells were treated with different concentrations of PD0166285, and 28-  
144 60 cells that entered and completed G2 phase over 6 h of imaging were tracked and their  
145 G2 durations were determined (Figure 4B). PD0166285 shortened G2 phase in a graded  
146 fashion. The highest concentration of PD0166285 (1  $\mu$ M) resulted in a G2 duration of 38  
147  $\pm$  17 min compared to 255  $\pm$  31 min in the DMSO-treated control (mean  $\pm$  S.D., Figure  
148 4B). This suggests that the Wee1/Myt1 switch is normally thrown very late in G2 phase.  
149 This also suggests that there is sufficient cyclin (and any other proteins essential for M  
150 phase entry) present even early in G2 phase to allow rapid mitotic entry, provided that  
151 Wee1/Myt1 activity is low. Moreover, the basal level of Wee1/Myt1 activity determines the



152 length of G2 phase. These results are consistent with and extend the findings of previous  
153 studies on the effects of Wee1/Myt1 inhibition (45, 50, 51).

154 Considering the central role of Wee1/Myt1 in controlling G2/M, we asked whether  
155 Wee1/Myt1 inhibition was able to overcome the cycloheximide-induced G2 arrest. We  
156 used the same experimental set up as described in Figure 3A, but after the initial imaging  
157 period added DMSO, cycloheximide, 1  $\mu$ M PD0166285, or cycloheximide plus 1  $\mu$ M  
158 PD0166285 to the cells. Again (cf. Figure 3D) cells treated with DMSO progressed into  
159 mitosis with normal G2 duration whereas cycloheximide prevented most cells from  
160 entering mitosis (Figure 4C-E and Figure 4-figure supplement 1A). All but one (99/100)  
161 of the PD0166285-treated cells entered mitosis within one hour of drug addition (Figure  
162 4C,D, and Figure 4-figure supplement 1A). Cells that were treated with PD0166285 late  
163 in G2 phase tended to enter mitosis more quickly than those treated early in G2 phase  
164 (Figure 4-figure supplement 1B). Consistent with these findings, the fraction of cells in  
165 mitosis spiked about 10-fold within the first hour of PD0166285 treatment and remained  
166 elevated for the rest of the experiment (Figure 4F).

167 Strikingly, cycloheximide did not block mitotic entry in the presence of PD0166285 (Figure  
168 4C,D, and Figure 4-figure supplement 1A), and cells progressed into mitosis with similar  
169 dynamics as cells treated with PD0166285 alone (Figure 4-figure supplement 1B). In  
170 contrast to cycloheximide treatment alone, the probability of a cell entering mitosis was  
171 ~100%, and was independent of the time the cell had spent in G2 phase at the time of  
172 drug addition (Figure 4E). This indicates that PD0166285 can override the cycloheximide-  
173 induced G2 arrest. The override was also observed when cells were treated with

174 cycloheximide for 2 h prior to the addition of PD0166285 (Figure 4–figure supplement  
175 1C). As we had observed for cells treated with the Wee1/Myt1 inhibitor alone, the mitotic  
176 index for cells treated with PD0166285 plus cycloheximide showed a pronounced spike  
177 within the first hour of treatment; however, the spike then slowly decayed over time  
178 (Figure 4F). The decay is consistent with the hypothesis that even though PD0166285  
179 abrogates the need for protein synthesis in G2 phase cells, cells earlier in the cell cycle  
180 still do need protein synthesis to ultimately carry out mitosis.

181  
182 **Cycloheximide treatment in S phase blocks cell cycle progression even in the**  
183 **absence of Wee1/Myt1 activity.**

184 Previous studies of Wee1 inhibitors have shown that they can drive chemotherapy-treated  
185 and p53-mutant cell lines into mitosis without completing DNA replication (52). To further  
186 explore the connection between protein synthesis and M-phase entry, we analyzed the  
187 cell cycle progression of cells treated with cycloheximide, PD0166825, or PD0166285  
188 plus cycloheximide while still in S phase. After being treated with DMSO in S phase, 100%  
189 of cells (85/85) entered G2 phase and 84% (71/85) of these cells progressed into mitosis  
190 during the 10 h imaging period (Figure 5A). In contrast, only 33% of cells (32/98) treated  
191 with cycloheximide during S phase progressed into G2 phase, whereas all other cells  
192 continued to display PCNA foci (albeit dimmer foci than those seen in control cells),  
193 suggesting that S phase was never completed (Figure 5A,B). All cells (99/99) treated with  
194 1  $\mu$ M PD0166285 during S phase entered mitosis; remarkably, 38 of them progressed  
195 into mitosis in the presence of PCNA foci and without displaying a detectable G2 phase

196 (Figure 5A,C), suggesting that at some stage of S phase there is enough pro-mitotic  
197 activity to drive cells into mitosis if Wee1/Myt1 are inhibited. However, most of the cells  
198 that had directly progressed into mitosis failed to undergo proper chromosome  
199 segregation and cytokinesis (28/38 failures compared to 3/61 cells which displayed a G2  
200 phase, Figure 5A,C) and even those cells that carried out some duration of G2 phase  
201 prior to mitotic entry required more time to progress through mitosis (Figure 5D).

202 Whereas Wee1/Myt1 inhibition had been able to overcome a cycloheximide arrest when  
203 cells had already entered G2 at the time of drug addition, only 32% of cells (34/105)  
204 treated with cycloheximide plus PD0166285 in S phase entered mitosis, 9 of them directly  
205 from S phase. 33% of the cells (38/105) never completed S phase and 19% (20/105)  
206 entered G2 phase but not mitosis. Cells that managed to enter mitosis frequently  
207 exhibited extended and qualitatively abnormal mitotic progression (Figure 5A,D). These  
208 findings underscore the hypothesis that some S-phase protein synthesis is required for  
209 mitotic entry even in the absence of the Cdk1-inhibiting activity of Wee1/Myt1.

210

### 211 **Wee1/Myt1 counteract pro-mitotic activities that accumulate during G2 phase.**

212 To further investigate the relationship between Wee1/Myt1 activity, G2 duration and a  
213 cell's ability to enter mitosis, we followed untreated cells for 6 h, treated cells with  
214 cycloheximide for 2 h, then added different Wee1/Myt1 inhibitor concentrations and  
215 assessed the cell's fate (Figure 4-figure supplement 1C,D). At the lowest concentration  
216 of PD0166285 (0.125  $\mu$ M), only a fraction of cells (31%, 32/104) progressed into mitosis  
217 and the probability for a cell to enter mitosis increased as the time the cell had spent in

218 G2 phase prior to cycloheximide addition increased (Figure 4–figure supplement 1D).  
219 With increasing PD0166285 concentrations, more cells were able to enter mitosis even if  
220 they had spent less time in G2 phase prior to drug addition (Figure 4–figure supplement  
221 1C,D). These results are consistent with the idea that pro-mitotic activities accumulate  
222 throughout G2 phase and are opposed by Wee1/Myt1 activity during this time. The later  
223 in G2 phase, the more pro-mitotic activities have accumulated and the less completely  
224 Wee1/Myt1 needs to be inhibited in order to flip the mitotic switch.

225

### 226 **p38 inhibition allows cells to enter mitosis in the presence of cycloheximide.**

227 The data presented so far are consistent with the hypothesis that in G2 phase cyclin  
228 synthesis triggers mitotic entry: cycloheximide blocks mitotic entry, and the effects of  
229 PD0166285 suggest that some pro-mitotic activity, possibly cyclin, gradually accumulates  
230 throughout G2 phase. However, it also remains possible that the ability of cycloheximide  
231 to block mitotic entry is due to its activation of p38 MAPK and MK2, rather than to any  
232 effect on cyclin accumulation (36, 40).

233 To address this issue directly, we treated cells with cycloheximide plus one of two p38  
234 MAPK inhibitors (SB202190 and SB203580) that act as high affinity inhibitors of p38 $\alpha$   
235 and p38 $\beta$  (MAPK14 and MAPK11) and as lower affinity inhibitors of other protein kinases  
236 (53). We verified that, as previously reported, cycloheximide stimulated the  
237 phosphorylation of p38 and its downstream target Hsp27, and that the inhibitors  
238 decreased cycloheximide-induced Hsp27 phosphorylation in a dose-dependent fashion  
239 (Figure 6A).

240 Both p38 inhibitors almost completely prevented cycloheximide from blocking the  
241 progression of G2 phase cells into M phase (Figure 6B,C). Whereas only 4 out of 100  
242 cells treated with cycloheximide alone entered M phase, 83 out of 100 SB202190- and  
243 77 out of 92 SB203580-treated cells did enter M phase in the presence of cycloheximide  
244 (Figure 6C). For cells treated with cycloheximide alone, the probability of entering M  
245 phase was near-zero unless the cells were treated late in G2 phase (Figure 6C,D), as  
246 shown earlier (Figure 3E); however, the probability of entering M phase for cells treated  
247 with cycloheximide plus either SB202190 or SB203580 was 10-20% for cells treated at  
248 the start of G2 phase and rose to near 100% for cells treated 2 h after the start of G2  
249 phase (Figure 6C,D). Overall 50 out 95 cells treated with SB202190 plus cycloheximide  
250 and 59 out of 91 cells treated with SB203580 plus cycloheximide exhibited a normal G2  
251 phase duration (within two standard deviations of the DMSO treated control, Figure 6 –  
252 figure supplement 1). However, a significant fraction of the cells treated early during G2  
253 phase had prolonged G2 durations, whereas cells treated later in G2 phase mostly  
254 exhibited a normal G2 duration (Figure 6–figure supplement 1B). The combination of  
255 cycloheximide plus SB202190 or SB203580 caused a small increase in the mitotic index  
256 followed by a slow decline to lower levels but rescued the sharp decline in mitotic cells  
257 observed in cycloheximide-treated cultures (Figure 6E and Figure 6–figure supplement  
258 2B). The structurally similar but inactive compound SB202474 did not prevent  
259 cycloheximide from blocking M-phase entry (Figure 6–figure supplement 2). Similar  
260 results were obtained in HeLa and hTERT-RPE1 cells (Figure 6–figure supplement  
261 2C,D).

262 Thus, the p38 MAPK inhibitors SB202190 and SB203580 allow the majority of the  
263 cycloheximide-treated G2-phase cells to progress into M phase. This suggests that p38-  
264 mediated checkpoint effects, rather than a lack of protein synthesis per se, are principally  
265 responsible for the arrest of cycloheximide-treated G2-phase cells.

266 Cells treated with SB202190 or SB203580 alone generally progressed through G2 phase  
267 normally, although about 20% of cells showed a prolonged G2 phase (Figure 6—figure  
268 supplement 1A) and a few cells (4/92 and 2/90) failed to enter M phase (Figure 6C). Thus,  
269 in normal, unperturbed cells, p38 has relatively little effect on G2 duration and M phase  
270 entry in cells that have not been treated with cycloheximide.

271

### 272 **Protein synthesis during G2 phase is required for normal mitotic progression.**

273 So far, we have shown that inhibition of either Wee1/Myt1 or p38 can overcome a  
274 cycloheximide-induced arrest and allow G2 phase cells to progress into mitosis in the  
275 absence of protein synthesis. However, the requirements to enter mitosis and to  
276 successfully progress through mitosis might differ (see, e.g. Gavet and Pines (22)).  
277 Consistent with this notion, we had already observed that cells treated with the  
278 Wee1/Myt1 inhibitor during S phase could enter mitosis (with little or no G2 phase) but  
279 then exhibited pronounced mitotic errors (Figure 5). In addition, a few cells treated with  
280 cycloheximide plus PD0166285 during G2 phase exhibited very long mitoses (Figure 4D),  
281 as did some cells treated with cycloheximide plus either of the p38 inhibitors (Figure 6C).  
282 Accordingly, we examined the duration of mitosis in cells treated in G2 phase with

283 cycloheximide plus either the Wee1/Myt1 inhibitor or one of the p38 inhibitors. A  
284 substantial fraction of the cells treated with PD0166285 with or without cycloheximide  
285 exhibited a protracted mitosis (47% for PD-treated cells and 58% for cells treated with PD  
286 plus cycloheximide, Figure 7A), taken here as mitosis longer than two standard deviations  
287 above the average duration of mitosis in DMSO-treated cells. Thus, PD- or PD- plus  
288 cycloheximide treated cells that successfully entered mitosis were, nevertheless, delayed  
289 in their progression through M phase. These results confirm previous findings that  
290 Wee1/Myt1 inhibition extends the mitotic duration (45). The duration of mitosis was a  
291 dose-dependent function of the PD0166285 concentration (Figure 7B; cf. Figure 4B).  
292 Moreover, the greater the shortening of G2 phase, the greater the delay in M phase  
293 (Figure 7–figure supplement 1).

294 For the p38 inhibitors SB202190 and SB203580, the drugs had some effect on the  
295 duration of mitosis even in the absence of cycloheximide; 17% (SB202190) and 4.5%  
296 (SB203580) of the drug-treated cells exhibited a protracted mitosis, versus 0% for the  
297 DMSO-treated controls (Figure 7C). This suggests that p38 function may contribute to M-  
298 phase progression in at least a subset of cells. A greater proportion of cells treated with  
299 either of the inhibitors plus cycloheximide exhibited a protracted mitosis (50% and 34%  
300 respectively), suggesting that the protein synthesis that normally occurs during G2 phase  
301 helps cells to progress through M phase in a timely fashion.

302

## 303 **Discussion**

304 Here we have used live-cell imaging to confirm the decades-old observation (1, 2) that  
305 the protein synthesis inhibitor cycloheximide prevents G2 phase cells from entering  
306 mitosis (Figure 3). Based on logistic regression analysis, the point of no return—the time  
307 at which the cell becomes refractory to cycloheximide treatment—occurs only at the end  
308 of G2 phase (Figure 3). On a cell biological level this timing approximately corresponds  
309 to when the antephase checkpoint is silenced (54-56). On a biochemical level, this is  
310 about when the activity of cyclin B1-Cdk1 rises to maximal levels (12, 15, 22). It is possible  
311 that all three of these phenomena are manifestations of the flipping of the bistable  
312 Cdk1/PP2A switch from its interphase to its M-phase state.

313 The cycloheximide effect appears not to be due to the inhibition of protein synthesis per  
314 se, but rather to the activation of p38 MAPKs. Accordingly, the p38 inhibitors SB202190  
315 and SB203580 largely restored mitotic entry in cycloheximide-treated cells (Figure 6 and  
316 Figure 6—figure supplement 1 and 2). Likewise, the Wee1/Myt1 inhibitor PD0166285  
317 allowed cycloheximide-treated cells to progress into mitosis, consistent with the  
318 hypothesis that the effects of the p38 inhibitors are ultimately mediated by the Cdc25  
319 and/or Wee1/Myt1 proteins (Figure 4). Taken together, these results suggest that G2  
320 phase cyclin synthesis, and G2 phase protein synthesis in general, is not strictly required  
321 for timely progression into M phase.

322 These findings also suggest that the accelerating accumulation of cyclin B1 that normally  
323 begins at about the onset of G2 phase is not the trigger for mitosis, or at least not the only  
324 trigger, since normal G2 durations can be seen in the absence of such protein synthesis.



325 This conclusion fits well with loss of function studies that show that cyclin A2 synthesis  
326 but not cyclin B1 synthesis is required for mitotic entry (57-59). Likewise, the current  
327 findings fit well with the observation that cyclin B1 overexpression has little or no effect  
328 on cell cycle dynamics (60).

329 What then is the trigger for mitosis? One possibility is that the cessation of some low but  
330 non-zero levels of ATR- or ATM-mediated checkpoint signaling (11, 57) at the S/G2  
331 boundary might set into motion a signal transduction process that leads to inactivation or  
332 degradation of Wee1/Myt1 (61-63) and activation of Cdc25. Consistent with this  
333 hypothesis, we observed that the duration of G2 phase is a sensitive function of the basal  
334 level of Wee1/Myt1 activity (Figure 4B). Another possibility is that the translocation of  
335 cyclin A2 from the nucleus to the cytoplasm, an event that occurs during late S phase,  
336 may initiate the events that lead to mitotic entry (64, 65). A third possibility is that the  
337 Bora-Aurora A-Plk1 pathway is the critical trigger (18, 66). How exactly cells integrate the  
338 different signaling pathways in order to decide whether or not to enter mitosis remains an  
339 important, open question in somatic cell cycle regulation.

340 Cycloheximide-treated cells rescued by p38 MAPK inhibition, and cells entering mitosis  
341 precociously due to Wee1/Myt1 inhibition, did take longer to progress through and exit  
342 mitosis (Figure 7). In both cases, these cells would be expected to enter mitosis with lower  
343 cyclin B1 levels than normal. The lower cyclin B1 levels could result in all or some mitotic  
344 substrates being phosphorylated more slowly, resulting in the observed mitotic delays.

345 G2 phase protein synthesis, or cyclin B1 synthesis more specifically, appears to represent  
346 “just-in-time” preparation for the next phase of the cell cycle. This concept, borrowed from

347 supply chain management, has been proposed to apply to protein synthesis and complex  
348 assembly in the bacterial cell cycle (67). Even though the proteins involved in the bacterial  
349 cell cycle bear little resemblance to those that regulate the eukaryotic cell cycle, perhaps  
350 this concept applies to both regulatory systems.

## 351 **Materials and Methods**

### 352 **Cell culture**

353 MCF10A human mammary epithelial cells were a kind gift from Sabrina Spencer and  
354 were cultured in growth medium DMEM:F12 (Gibco, #11320-033) containing 5% horse  
355 serum (Gibco, catalog number 16050114), 20 ng/ml EGF (PreproTech, AF-100-15), 0.5  
356 mg/mL hydrocortisone (Sigma-Aldrich, H0888-1g), 100 ng/ml cholera toxin (Sigma-  
357 Aldrich, C8052-2mg) 10  $\mu$ g/ml insulin (Sigma-Aldrich, I1882-100mg), 1% penicillin, and  
358 1% streptomycin (both from Life Technologies, catalog number 15140-122) as described  
359 previously (41, 42). HeLa cells (CCL-2) were purchased from the ATCC and cultured in  
360 Dulbecco's modified Eagle medium containing high glucose and pyruvate (Invitrogen,  
361 #11995-073) supplemented with 10% fetal bovine serum (Axenia Biologix, #F001), 1%  
362 penicillin, 1% streptomycin, and 4 mM L-glutamine (all from Gemini Bio-Products, #400-  
363 110). HEK 293T cells were obtained from ATCC (CRL-3216) and cultured in the same  
364 medium as HeLa. hTERT RPE-1 cells were obtained from ATCC (CRF-4000) and  
365 cultured in DMEM:F12 (Gibco, catalog number 11320-033), 10% fetal bovine serum  
366 (Axenia Biologix, #F001), 0.01 mg/ml hygromycin B (Invitrogen, 10687-010), 1%  
367 penicillin, and 1% streptomycin. All cells were maintained at 37°C and 5% CO<sub>2</sub> and  
368 discarded after passage 25.

## 369 **Stable cell lines**

370 To obtain MCF10A cells stably expressing eYFP-PCNA, we sub-cloned eYFP-PCNA  
371 from the eYFP-PCNA construct (43) into the pTRIP-EF1 $\alpha$  lentiviral transfer vector (68),  
372 kindly provided by Ed Grow at Stanford University, by using the *Xba*I and *Bam*HI  
373 restriction sites. To make lentivirus, we incubated 1 ml Opti-MEM and 36  $\mu$ l FuGENE6 for  
374 5 min at room temperature, then added 10  $\mu$ g pTRIP-EF1 $\alpha$ -eYFP-PCNA, and 6.6  $\mu$ g  
375 pCMV $\Delta$ R8.74, 3.3  $\mu$ g pMD.G-VSVG, and 3.3  $\mu$ g pRev (all kindly provided by Ed Grow),  
376 and incubated for 30 min. We used this to transfect HEK 293T cells in Opti-MEM for 6 h  
377 at 37°C and 5% CO<sub>2</sub> and then exchanged with fresh Opti-MEM. We harvested medium  
378 containing virus 48 h, 72 h, and 96 h later, filtered out cell debris with a sterile 0.45- $\mu$ m  
379 filter (Millipore), concentrated by centrifuging for 20 min at 3600 rpm in Amicon-Ultra 15  
380 Filter Units with a 100,000 kDa MW cutoff (Millipore), and froze down at -80°C. To  
381 transduce MCF10A cells, we added concentrated virus and 5  $\mu$ g/ml polybrene (Sigma-  
382 Aldrich) to MCF10A cells in growth media, incubated for 24 h, and replaced with growth  
383 media. After culturing cells for 5 more days, we sorted for eYFP-positive cells by  
384 fluorescence-activated cell sorting. To obtain MCF10A cells stably expressing eYFP-  
385 PCNA and histone H2B-mCherry or histone H2B-mTurquoise we made lentivirus as  
386 above with histone H2B-mCherry or histone H2B-mTurquoise sub-cloned into the CSII-  
387 EF lentiviral transfer vector (69). We used it to transduce MCF10A cells stably expressing  
388 eYFP-PCNA and then sorted for cells positive for both fluorescent proteins using  
389 fluorescence-activated cell sorting. The hTERT RPE-1 cells stably expressing eYFP-  
390 PCNA and histone H2B-mTurquoise cells were produced in the same manner.

391 To obtain HeLa cells stably expressing eYFP-PCNA, we linearized the eYFP-PCNA  
392 construct (43) by incubating with *FspI* (New England Biolabs) and purifying with ethanol  
393 precipitation. We co-transfected linearized eYFP-PCNA and linearized hygromycin  
394 marker (Clontech) with FuGENE6 (Promega) at a ratio of 1  $\mu\text{g}$  eYFP-PCNA to 0.1  $\mu\text{g}$   
395 hygromycin marker to 6  $\mu\text{l}$  FuGENE6 according to the manufacturer's instructions except  
396 that we washed cells with Opti-MEM (Invitrogen), transfected cells in Opti-MEM, and  
397 incubated in Opti-MEM for 5 h at 37°C and 5% CO<sub>2</sub> before replacing with growth medium.  
398 We split cells 48 h later and after 25 more h added 400  $\mu\text{g}/\text{ml}$  hygromycin B (Invitrogen).  
399 We picked colonies 11 days later using cloning rings and expanded a clone that had  
400 correct PCNA localization in the nucleus and could form PCNA foci.

#### 401 **Chemical inhibitors**

402 PD0166285 was generously provided by Pfizer and later purchased from EMD Millipore  
403 (#513028) and stored frozen as a 25 mM stock in DMSO (Sigma-Aldrich) and used at a  
404 final concentration of 1  $\mu\text{M}$  if not specified differently. Cycloheximide was purchased from  
405 Sigma-Aldrich, stored frozen as a 10 mg/ml stock in water and used at a final  
406 concentration of 10  $\mu\text{g}/\text{ml}$ . SB202474 (EMD Millipore, #559387) and SB202190 (Sigma,  
407 S7067) were stored frozen as 50 mM or 10 mM stock solutions in DMSO. SB203580  
408 (EMD Millipore, #559387) was stored frozen as a 50 mM stock solution. SB202474,  
409 SB202190 and SB203580 were used at a final concentration of 50  $\mu\text{M}$  if not specified  
410 differently.

#### 411 **Live-cell time-lapse microscopy and image analysis**

412 Cells were seeded into 96-well plates (Costar) or collagen-coated (PureCol, Advanced

413 BioMatrix, #5005-1ML) 96-well glass bottom plate (Cellvis, P96-1.5H-N) the day before  
414 microscopy at such a density that they were sub-confluent even at the end of the  
415 experiment. To prevent drying, each well of the plate contained between 100 and 200  $\mu$ l  
416 of growth medium. Images were taken in 10 min or 15 min intervals, depending on the  
417 needs of the experiment, on the ImageXpress Micro System Standard Model (Molecular  
418 Devices) controlled by the MetaXpress 5.1 software (Molecular Devices) using the 10X  
419 objective (NA = 0.3, Plan Fluor) or the 20X objective (NA = 0.45, Plan Fluor ELWD). Cells  
420 were kept alive inside the microscope in a humidified chamber at 37°C and 5% CO<sub>2</sub>. We  
421 used the YFP-LIVE filter cube for imaging eYFP-PCNA, the CFP-LIVE filter cube for  
422 imaging histone H2B-mTurquoise, the HcRED-LIVE filter cube for imaging histone H2B-  
423 mCherry. Combined exposure through all the filter cubes did not exceed 700 msec per  
424 frame. We used 4x gain and 1x1 or 2x2 binning.

425 Raw TIFF images were exported using the MetaXpress 5.1 software (Molecular Devices)  
426 and collated into time series by well and site using a script written in MATLAB  
427 (MathWorks) or Python. Cells were tracked manually and each relevant change in a  
428 fluorescent reporter (PCNA focus disappearance, etc.) was recorded in Excel (Microsoft).  
429 For some analyses we used a graphical user interface written in LabView (National  
430 Instruments) that recorded the frame number and cell coordinates by responding to a  
431 mouse click and exported results to Excel (Microsoft). To allow features like PCNA foci to  
432 be easily perceived, images were typically min-max adjusted, and we sometimes allowed  
433 the H2B-mCherry image to be saturated in the mitotic stages in order to allow the low  
434 intensity H2B-mCherry signal in interphase to be perceivable. A custom-written Matlab

435 script provided by Tobias Meyer's laboratory was used to count the total number of cells  
436 in every time frame in order to calculate mitotic indices.

### 437 **Immunoblotting and antibodies**

438 2 ml of MCF10A cell suspension at a cell concentration of  $1.5 \times 10^5$  cells/ml was seeded  
439 into a 6-well plate (Falcon, #353046) and grown for 48 h at 37°C. The medium was  
440 exchanged and the cells were grown for another 6 h. An equal volume of medium  
441 containing the prediluted inhibitors was then added to the cells, and the cells were  
442 incubated for 30 min (for PD0166285) or 6 h (for cycloheximide and cycloheximide plus  
443 either SB202190 or SB203580). The medium was then removed, cells were washed twice  
444 with cold PBS and lysed with lysis buffer (20 mM Tris-HCl pH 7.4, 150 mM NaCl, 1% NP-  
445 40, 1 mM EDTA, 1x Phosstop #4906845001, 1x cOmplete #11873580001). Samples  
446 were boiled in SDS PAGE sample buffer and analyzed by SDS PAGE and  
447 immunoblotting. The following antibodies were used: rabbit  $\alpha$ -Cdk1 phospho-Tyr15 (Cell  
448 Signaling Technology, #9111L), mouse  $\alpha$ -Cdk1 (Santa Cruz Biotechnology #SC-54),  
449 mouse  $\alpha$ -tubulin (Santa Cruz Biotechnology #SC-32293), rabbit  $\alpha$ -HSP27 phospho-  
450 Ser82 (Cell Signaling Technology, #2401), mouse  $\alpha$ -HSP27 (Cell Signaling Technology,  
451 #2402), rabbit  $\alpha$ -p38 MAPK (Cell Signaling Technology, #9212) and rabbit  $\alpha$ -p38 MAPK  
452 phospho-Thr180/Tyr182 (Cell Signaling Technology, #9211).

### 453 **Statistical analysis**

454 Logistic regression analysis is a method for estimating how the probability of a binary  
455 outcome—in our case, whether a cell does or does not ultimately progress into mitosis—  
456 varies as a function of time and treatment conditions. The underlying assumption is that

457 the odds of progressing into mitosis scale multiplicatively with time, which means that the  
458 time course data should be approximated by a logistic function, with parameters for the  
459 steepness and time of the transition from low to high probability. We binarized cell  
460 outcomes (i.e., the cell either did or did not progress into mitosis within the average G2  
461 phase duration plus two standard deviations of the DMSO-treated control ), plotted the  
462 fraction of cells that attained the outcome as a function of the time of drug addition, and  
463 fitted the data to a logistic function using the LogitModelFit command in Mathematica 10.  
464 The 95% confidence bands were calculated using code deposited in the Mathematica  
465 Stack Exchange ([https://mathematica.stackexchange.com/questions/26616/how-can-i-](https://mathematica.stackexchange.com/questions/26616/how-can-i-compute-and-plot-the-95-confidence-bands-for-a-fitted-logistic-regres)  
466 [compute-and-plot-the-95-confidence-bands-for-a-fitted-logistic-regres](https://mathematica.stackexchange.com/questions/26616/how-can-i-compute-and-plot-the-95-confidence-bands-for-a-fitted-logistic-regres)).

467 Further statistical analyses were performed using Graphpad Prism 8.0.2.

468 All experiments except the immunoblot analyses have been performed in at least two  
469 biological replicates – meaning that cells were freshly plated, imaged and independently  
470 treated with the respective drugs – of which usually one representative experiment is  
471 shown (sometimes we show both).

472

## 473 **Acknowledgments**

474 We thank Mary Teruel, Michael Zhao and the Stanford High Throughput Biosciences  
475 Facility for help with the ImageExpress microscopy; We thank Arne Lindqvist, Tim  
476 Stearns, Tobias Meyer, Karlene A. Cimprich, Aaron F. Straight, Frederick G. Westhorpe,  
477 Whitney L. Johnson, and Bradley T. French for helpful discussions. We are indebted to

478 Sabrina L. Spencer, Ed Grow, Tony Yu-Chen Tsai, Paul G. Rack, M. Cristina Cardoso,  
479 and Michael W. Davidson for sharing reagents. We acknowledge help with LabView from  
480 Taru Roy, help with image analysis from Colin J. Fuller, and help with MATLAB from  
481 Feng-Chiao Tsai, Sabrina Spencer, Jeremy B. Chang, Graham A. Anderson, and Tony  
482 Yu-Chen Tsai. We are grateful to Pfizer for providing PD0166285. We thank the Stanford  
483 FACS Facility and the Stanford High-Throughput Biosciences Facility for technical  
484 assistance; and Silke Hauf, Oshri Afanzar, Xianrui Cheng, Yuping Chen, William Huang,  
485 Shixuan Liu, and Connie Phong, for comments on the manuscript. The work was  
486 supported by grants from the National Institutes of Health (R01 GM046383 and R35  
487 GM131792, J.E.F.), a Stanford Graduate Fellowship (S.L.), the Stanford Training Grant  
488 in Chemical and Molecular Pharmacology (T32 GM067586, S.L.), and a postdoctoral  
489 fellowship from the German Research Foundation (KA 4476/1-1, J.K.).



## 490 References

- 491 1. Donnelly GM, Sisken JE. RNA and protein synthesis required for entry of cells into  
492 mitosis and during the mitotic cycle. *Exp Cell Res.* 1967;46(1):93-105.
- 493 2. Verbin RS, Farber E. Effect of cycloheximide on the cell cycle of the crypts of the  
494 small intestine of the rat. *J Cell Biol.* 1967;35(3):649-58.
- 495 3. Evans T, Rosenthal ET, Youngblom J, Distel D, Hunt T. Cyclin: a protein specified  
496 by maternal mRNA in sea urchin eggs that is destroyed at each cleavage division.  
497 *Cell.* 1983;33(2):389-96.
- 498 4. Moreno S, Hayles J, Nurse P. Regulation of p34cdc2 protein kinase during mitosis.  
499 *Cell.* 1989;58(2):361-72.
- 500 5. Morgan DO. *The cell cycle : principles of control.* London: New Science Press; 2007.
- 501 6. Murray AW, Solomon MJ, Kirschner MW. The role of cyclin synthesis and  
502 degradation in the control of maturation promoting factor activity. *Nature.*  
503 1989;339(6222):280-6.
- 504 7. Murray AW, Kirschner MW. Cyclin synthesis drives the early embryonic cell cycle.  
505 *Nature.* 1989;339(6222):275-80.
- 506 8. Minshull J, Blow JJ, Hunt T. Translation of cyclin mRNA is necessary for extracts of  
507 activated xenopus eggs to enter mitosis. *Cell.* 1989;56(6):947-56.
- 508 9. Dyson N. The regulation of E2F by pRB-family proteins. *Genes Dev.*  
509 1998;12(15):2245-62.
- 510 10. Reimann JD, Gardner BE, Margottin-Goguet F, Jackson PK. Emi1 regulates the  
511 anaphase-promoting complex by a different mechanism than Mad2 proteins. *Genes*  
512 *Dev.* 2001;15(24):3278-85.
- 513 11. Saldivar JC, Hamperl S, Bocek MJ, Chung M, Bass TE, Cisneros-Soberanis F, et  
514 al. An intrinsic S/G2 checkpoint enforced by ATR. *Science.* 2018;361(6404):806-10.
- 515 12. Akopyan K, Silva Cascales H, Hukasova E, Saurin AT, Mullers E, Jaiswal H, et al.  
516 Assessing kinetics from fixed cells reveals activation of the mitotic entry network at  
517 the S/G2 transition. *Mol Cell.* 2014;53(5):843-53.
- 518 13. Deibler RW, Kirschner MW. Quantitative reconstitution of mitotic CDK1 activation in  
519 somatic cell extracts. *Mol Cell.* 2010;37(6):753-67.
- 520 14. Frisa PS, Jacobberger JW. Cell cycle-related cyclin b1 quantification. *PLoS One.*  
521 2009;4(9):e7064.
- 522 15. Jacobberger JW, Avva J, Sreenath SN, Weis MC, Stefan T. Dynamic epitope  
523 expression from static cytometry data: principles and reproducibility. *PLoS One.*  
524 2012;7(2):e30870.
- 525 16. Pines J, Hunter T. Human cyclins A and B1 are differentially located in the cell and  
526 undergo cell cycle-dependent nuclear transport. *J Cell Biol.* 1991;115(1):1-17.
- 527 17. Macurek L, Lindqvist A, Lim D, Lampson MA, Klompaker R, Freire R, et al. Polo-  
528 like kinase-1 is activated by aurora A to promote checkpoint recovery. *Nature.*  
529 2008;455(7209):119-23.
- 530 18. Seki A, Coppinger JA, Jang CY, Yates JR, Fang G. Bora and the kinase Aurora a  
531 cooperatively activate the kinase Plk1 and control mitotic entry. *Science.*  
532 2008;320(5883):1655-8.
- 533 19. Crncec A, Hochegger H. Triggering mitosis. *FEBS Lett.* 2019;593(20):2868-88.

- 534 20. Heim A, Rymarczyk B, Mayer TU. Regulation of Cell Division. *Adv Exp Med Biol.*  
535 2017;953:83-116.
- 536 21. Lindqvist A, van Zon W, Karlsson Rosenthal C, Wolthuis RM. Cyclin B1-Cdk1  
537 activation continues after centrosome separation to control mitotic progression.  
538 *PLoS Biol.* 2007;5(5):e123.
- 539 22. Gavet O, Pines J. Progressive activation of CyclinB1-Cdk1 coordinates entry to  
540 mitosis. *Dev Cell.* 2010;18(4):533-43.
- 541 23. Hagting A, Jackman M, Simpson K, Pines J. Translocation of cyclin B1 to the  
542 nucleus at prophase requires a phosphorylation-dependent nuclear import signal.  
543 *Curr Biol.* 1999;9(13):680-9.
- 544 24. Santos SD, Wollman R, Meyer T, Ferrell JE, Jr. Spatial positive feedback at the  
545 onset of mitosis. *Cell.* 2012;149(7):1500-13.
- 546 25. Jin P, Hardy S, Morgan DO. Nuclear localization of cyclin B1 controls mitotic entry  
547 after DNA damage. *J Cell Biol.* 1998;141(4):875-85.
- 548 26. Li J, Meyer AN, Donoghue DJ. Nuclear localization of cyclin B1 mediates its  
549 biological activity and is regulated by phosphorylation. *Proc Natl Acad Sci U S A.*  
550 1997;94(2):502-7.
- 551 27. Pomerening JR, Sontag ED, Ferrell JE, Jr. Building a cell cycle oscillator: hysteresis  
552 and bistability in the activation of Cdc2. *Nat Cell Biol.* 2003;5(4):346-51.
- 553 28. Sha W, Moore J, Chen K, Lassaletta AD, Yi CS, Tyson JJ, et al. Hysteresis drives  
554 cell-cycle transitions in *Xenopus laevis* egg extracts. *Proc Natl Acad Sci U S A.*  
555 2003;100(3):975-80.
- 556 29. Novak B, Tyson JJ. Modeling the Cell Division Cycle: M-phase Trigger, Oscillations,  
557 and Size Control. *Journal of Theoretical Biology.* 1993;165(1):101-34.
- 558 30. Gharbi-Ayachi A, Labbe JC, Burgess A, Vigneron S, Strub JM, Brioudes E, et al.  
559 The substrate of Greatwall kinase, Arpp19, controls mitosis by inhibiting protein  
560 phosphatase 2A. *Science.* 2010;330(6011):1673-7.
- 561 31. Mochida S, Maslen SL, Skehel M, Hunt T. Greatwall phosphorylates an inhibitor of  
562 protein phosphatase 2A that is essential for mitosis. *Science.* 2010;330(6011):1670-  
563 3.
- 564 32. Mochida S, Rata S, Hino H, Nagai T, Novak B. Two Bistable Switches Govern M  
565 Phase Entry. *Curr Biol.* 2016;26(24):3361-7.
- 566 33. Rata S, Suarez Peredo Rodriguez MF, Joseph S, Peter N, Echegaray Iturra F, Yang  
567 F, et al. Two Interlinked Bistable Switches Govern Mitotic Control in Mammalian  
568 Cells. *Curr Biol.* 2018;28(23):3824-32 e6.
- 569 34. Vinod PK, Novak B. Model scenarios for switch-like mitotic transitions. *FEBS Lett.*  
570 2015;589(6):667-71.
- 571 35. Tsai TY, Theriot JA, Ferrell JE, Jr. Changes in oscillatory dynamics in the cell cycle  
572 of early *Xenopus laevis* embryos. *PLoS Biol.* 2014;12(2):e1001788.
- 573 36. Reinhardt HC, Yaffe MB. Kinases that control the cell cycle in response to DNA  
574 damage: Chk1, Chk2, and MK2. *Curr Opin Cell Biol.* 2009;21(2):245-55.
- 575 37. Blackford AN, Jackson SP. ATM, ATR, and DNA-PK: The Trinity at the Heart of the  
576 DNA Damage Response. *Mol Cell.* 2017;66(6):801-17.
- 577 38. Saldivar JC, Cortez D, Cimprich KA. The essential kinase ATR: ensuring faithful

- 578 duplication of a challenging genome. *Nat Rev Mol Cell Biol.* 2017;18(10):622-36.
- 579 39. Manke IA, Nguyen A, Lim D, Stewart MQ, Elia AE, Yaffe MB. MAPKAP kinase-2 is  
580 a cell cycle checkpoint kinase that regulates the G2/M transition and S phase  
581 progression in response to UV irradiation. *Mol Cell.* 2005;17(1):37-48.
- 582 40. Kyriakis JM, Banerjee P, Nikolakaki E, Dai T, Rubie EA, Ahmad MF, et al. The  
583 stress-activated protein kinase subfamily of c-Jun kinases. *Nature.*  
584 1994;369(6476):156-60.
- 585 41. Debnath J, Muthuswamy SK, Brugge JS. Morphogenesis and oncogenesis of MCF-  
586 10A mammary epithelial acini grown in three-dimensional basement membrane  
587 cultures. *Methods.* 2003;30(3):256-68.
- 588 42. Soule HD, Maloney TM, Wolman SR, Peterson WD, Jr., Brenz R, McGrath CM, et  
589 al. Isolation and characterization of a spontaneously immortalized human breast  
590 epithelial cell line, MCF-10. *Cancer Res.* 1990;50(18):6075-86.
- 591 43. Hahn AT, Jones JT, Meyer T. Quantitative analysis of cell cycle phase durations and  
592 PC12 differentiation using fluorescent biosensors. *Cell Cycle.* 2009;8(7):1044-52.
- 593 44. Leonhardt H, Rahn HP, Weinzierl P, Sporbert A, Cremer T, Zink D, et al. Dynamics  
594 of DNA replication factories in living cells. *J Cell Biol.* 2000;149(2):271-80.
- 595 45. Araujo AR, Gelens L, Sheriff RS, Santos SD. Positive Feedback Keeps Duration of  
596 Mitosis Temporally Insulated from Upstream Cell-Cycle Events. *Mol Cell.*  
597 2016;64(2):362-75.
- 598 46. Baserga R. The biology of cell reproduction: Conference Proceedings; 1985.
- 599 47. Essers J, Theil AF, Baldeyron C, van Cappellen WA, Houtsmuller AB, Kanaar R, et  
600 al. Nuclear dynamics of PCNA in DNA replication and repair. *Mol Cell Biol.*  
601 2005;25(21):9350-9.
- 602 48. Gerlich D, Koch B, Dupeux F, Peters JM, Ellenberg J. Live-cell imaging reveals a  
603 stable cohesin-chromatin interaction after but not before DNA replication. *Curr Biol.*  
604 2006;16(15):1571-8.
- 605 49. Gavet O, Pines J. Activation of cyclin B1-Cdk1 synchronizes events in the nucleus  
606 and the cytoplasm at mitosis. *J Cell Biol.* 2010;189(2):247-59.
- 607 50. Wang Y, Li J, Booher RN, Kraker A, Lawrence T, Leopold WR, et al.  
608 Radiosensitization of p53 mutant cells by PD0166285, a novel G(2) checkpoint  
609 abrogator. *Cancer Res.* 2001;61(22):8211-7.
- 610 51. Krek W, Nigg EA. Mutations of p34cdc2 phosphorylation sites induce premature  
611 mitotic events in HeLa cells: evidence for a double block to p34cdc2 kinase  
612 activation in vertebrates. *EMBO J.* 1991;10(11):3331-41.
- 613 52. Aarts M, Sharpe R, Garcia-Murillas I, Gevensleben H, Hurd MS, Shumway SD, et  
614 al. Forced mitotic entry of S-phase cells as a therapeutic strategy induced by  
615 inhibition of WEE1. *Cancer Discov.* 2012;2(6):524-39.
- 616 53. Davies SP, Reddy H, Caivano M, Cohen P. Specificity and mechanism of action of  
617 some commonly used protein kinase inhibitors. *Biochem J.* 2000;351(Pt 1):95-105.
- 618 54. Pines J, Rieder CL. Re-staging mitosis: a contemporary view of mitotic progression.  
619 *Nat Cell Biol.* 2001;3(1):E3-6.
- 620 55. Rieder CL, Cole R. Microtubule disassembly delays the G2-M transition in  
621 vertebrates. *Curr Biol.* 2000;10(17):1067-70.

- 622 56. Rieder CL, Cole RW. Entry into mitosis in vertebrate somatic cells is guarded by a  
623 chromosome damage checkpoint that reverses the cell cycle when triggered during  
624 early but not late prophase. *J Cell Biol.* 1998;142(4):1013-22.
- 625 57. Gong D, Ferrell JE, Jr. The roles of cyclin A2, B1, and B2 in early and late mitotic  
626 events. *Mol Biol Cell.* 2010;21(18):3149-61.
- 627 58. Gong D, Pomerening JR, Myers JW, Gustavsson C, Jones JT, Hahn AT, et al. Cyclin  
628 A2 regulates nuclear-envelope breakdown and the nuclear accumulation of cyclin  
629 B1. *Curr Biol.* 2007;17(1):85-91.
- 630 59. Hégarat N, Crncec A, Suarez Peredoa Rodriguez MF, Iturra FE, Gu Y, Lang PF, et  
631 al. Cyclin A triggers Mitosis either via Greatwall or Cyclin B. *bioRxiv.* 2018:501684.
- 632 60. Resnitzky D, Gossen M, Bujard H, Reed SI. Acceleration of the G1/S phase  
633 transition by expression of cyclins D1 and E with an inducible system. *Mol Cell Biol.*  
634 1994;14(3):1669-79.
- 635 61. Ayad NG, Rankin S, Murakami M, Jebanathirajah J, Gygi S, Kirschner MW. Tome-  
636 1, a trigger of mitotic entry, is degraded during G1 via the APC. *Cell.*  
637 2003;113(1):101-13.
- 638 62. Michael WM, Newport J. Coupling of mitosis to the completion of S phase through  
639 Cdc34-mediated degradation of Wee1. *Science.* 1998;282(5395):1886-9.
- 640 63. Watanabe N, Arai H, Nishihara Y, Taniguchi M, Watanabe N, Hunter T, et al. M-  
641 phase kinases induce phospho-dependent ubiquitination of somatic Wee1 by  
642 SCFbeta-TrCP. *Proc Natl Acad Sci U S A.* 2004;101(13):4419-24.
- 643 64. Cascales HS, Burdova K, Müllers E, Stoy H, Morgen Pv, Macurek L, et al. Cyclin A2  
644 localises in the cytoplasm at the S/G2 transition to activate Plk1. *bioRxiv.*  
645 2017:191437.
- 646 65. Jackman M, Kubota Y, den Elzen N, Hagting A, Pines J. Cyclin A- and cyclin E-Cdk  
647 complexes shuttle between the nucleus and the cytoplasm. *Mol Biol Cell.*  
648 2002;13(3):1030-45.
- 649 66. Vigneron S, Sundermann L, Labbe JC, Pintard L, Radulescu O, Castro A, et al.  
650 Cyclin A-cdk1-Dependent Phosphorylation of Bora Is the Triggering Factor  
651 Promoting Mitotic Entry. *Dev Cell.* 2018;45(5):637-50 e7.
- 652 67. McAdams HH, Shapiro L. A bacterial cell-cycle regulatory network operating in time  
653 and space. *Science.* 2003;301(5641):1874-7.
- 654 68. Dardalhon V, Herpers B, Noraz N, Pflumio F, Guetard D, Leveau C, et al. Lentivirus-  
655 mediated gene transfer in primary T cells is enhanced by a central DNA flap. *Gene*  
656 *Ther.* 2001;8(3):190-8.
- 657 69. Spencer SL, Cappell SD, Tsai FC, Overton KW, Wang CL, Meyer T. The  
658 proliferation-quiescence decision is controlled by a bifurcation in CDK2 activity at  
659 mitotic exit. *Cell.* 2013;155(2):369-83.

660

## Figures and Figure Legends

Figure 1

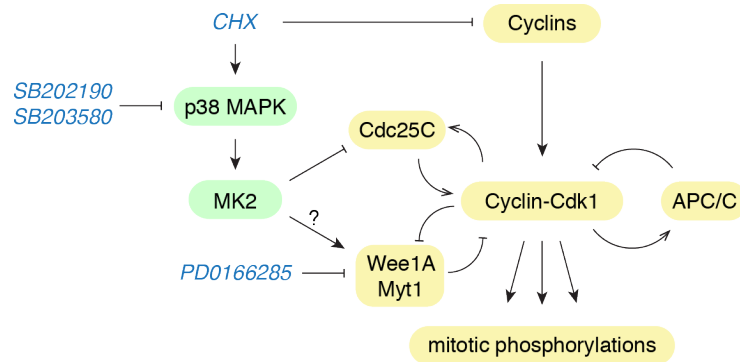

### The mitotic entry network.

Schematic of the regulation of Cdk1 activity at the G2/M transition by cyclins and multiple feedback loops. The protein synthesis inhibitor cycloheximide (CHX) can block cyclin accumulation, and activate p38 MAPK causing a delay in G2/M progression by inhibiting Cdc25 and/or potentially activating Wee1/Myt1 (36).

**Figure 2**

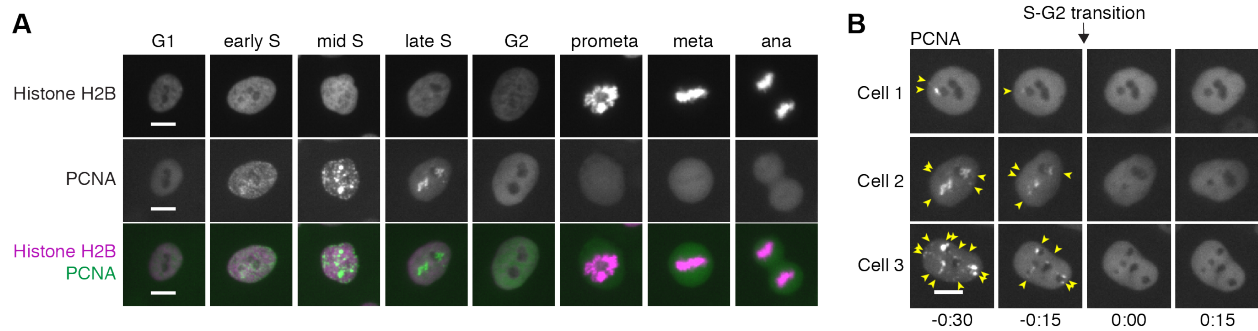

**Measuring the duration of cell cycle phases using fluorescently labelled PCNA and histone H2B in MCF10A cells.**

(A) eYFP-PCNA can be used to determine the onset of S phase, the completion of S phase, and the onset of mitosis (nuclear envelope breakdown); histone H2B-mTurquoise (used here) or histone H2B-mCherry can be used to determine anaphase onset (B) Three examples of cells showing the disappearance of eYFP-PCNA foci (arrows) at the end of S phase. Time (in the format h:min) was aligned to the time of entry into G2 phase. Scale bars: 10  $\mu$ m.

## Figure 3

**A**

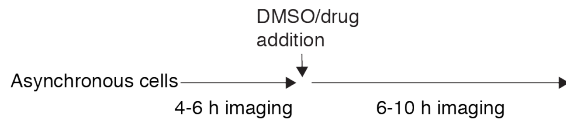

**B**

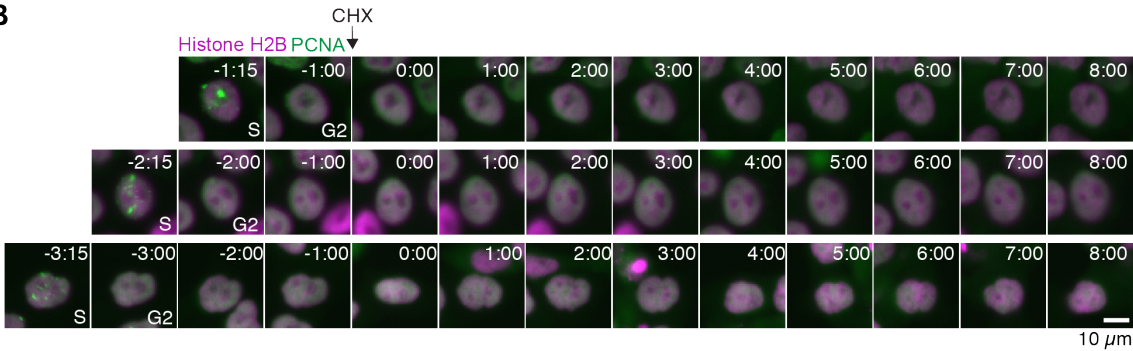

**C**

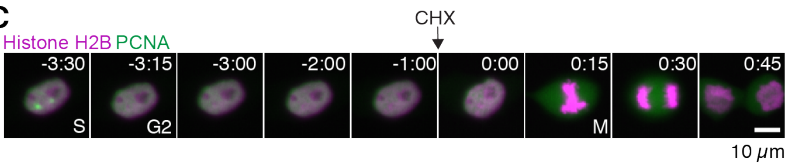

**D**

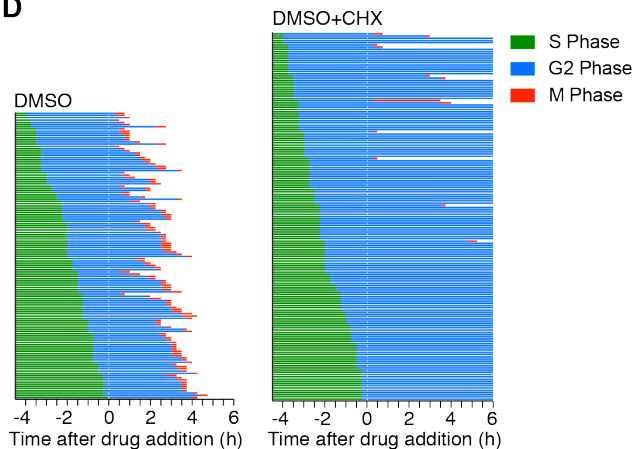

**E**

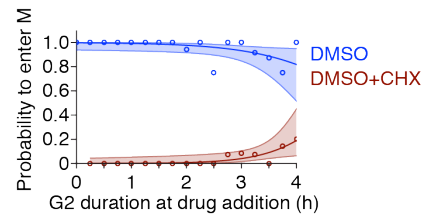

**F**

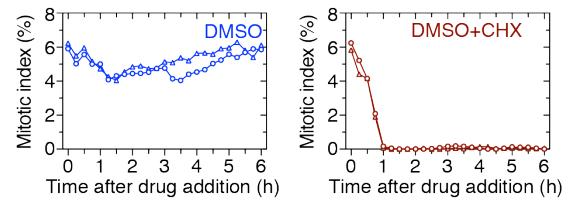

### Cycloheximide blocks entry into mitosis.

(A) Schematic of the experimental setup: asynchronously grown cells were imaged for 4-6 h in order to determine the time when cells exited S phase. After this period DMSO or small molecule inhibitors were added, and cells were followed for another 6-10 h to determine whether and when the cells entered mitosis. (B-C) Montages of MCF10A cells expressing H2B-mCherry and eYFP-PCNA followed over the time course of the experiment described in (A). Time (in the format h:min) was aligned to the point of DMSO

or cycloheximide addition. Three cells are shown that had spent different amounts of time in G2 phase at the time of cycloheximide addition, and subsequently either arrested in G2 phase (B) or entered mitosis (C). (D) Cell cycle progression in MCF10A cells expressing H2B-Turquoise and eYFP-PCNA and treated with DMSO (left, n=130) or CHX (right, n=165). (E) Logistic regression analysis. This estimates the probability of a cell entering mitosis as a function of how long the cell had been in G2 phase at the time of drug addition, for the experiment shown in (D). Circles indicate the fraction of cells that ultimately entered mitosis for given times of drug addition. The solid lines show the logistic fit for the data and the lightly colored areas indicate the 95% confidence intervals. (F) Mitotic indices for MCF10A cells expressing H2B-Turquoise and eYFP-PCNA cells treated with DMSO or CHX. Shown are two independent experiments (circles and triangles, respectively). At least 3605 cells were counted for each timepoint.



**Figure 4**

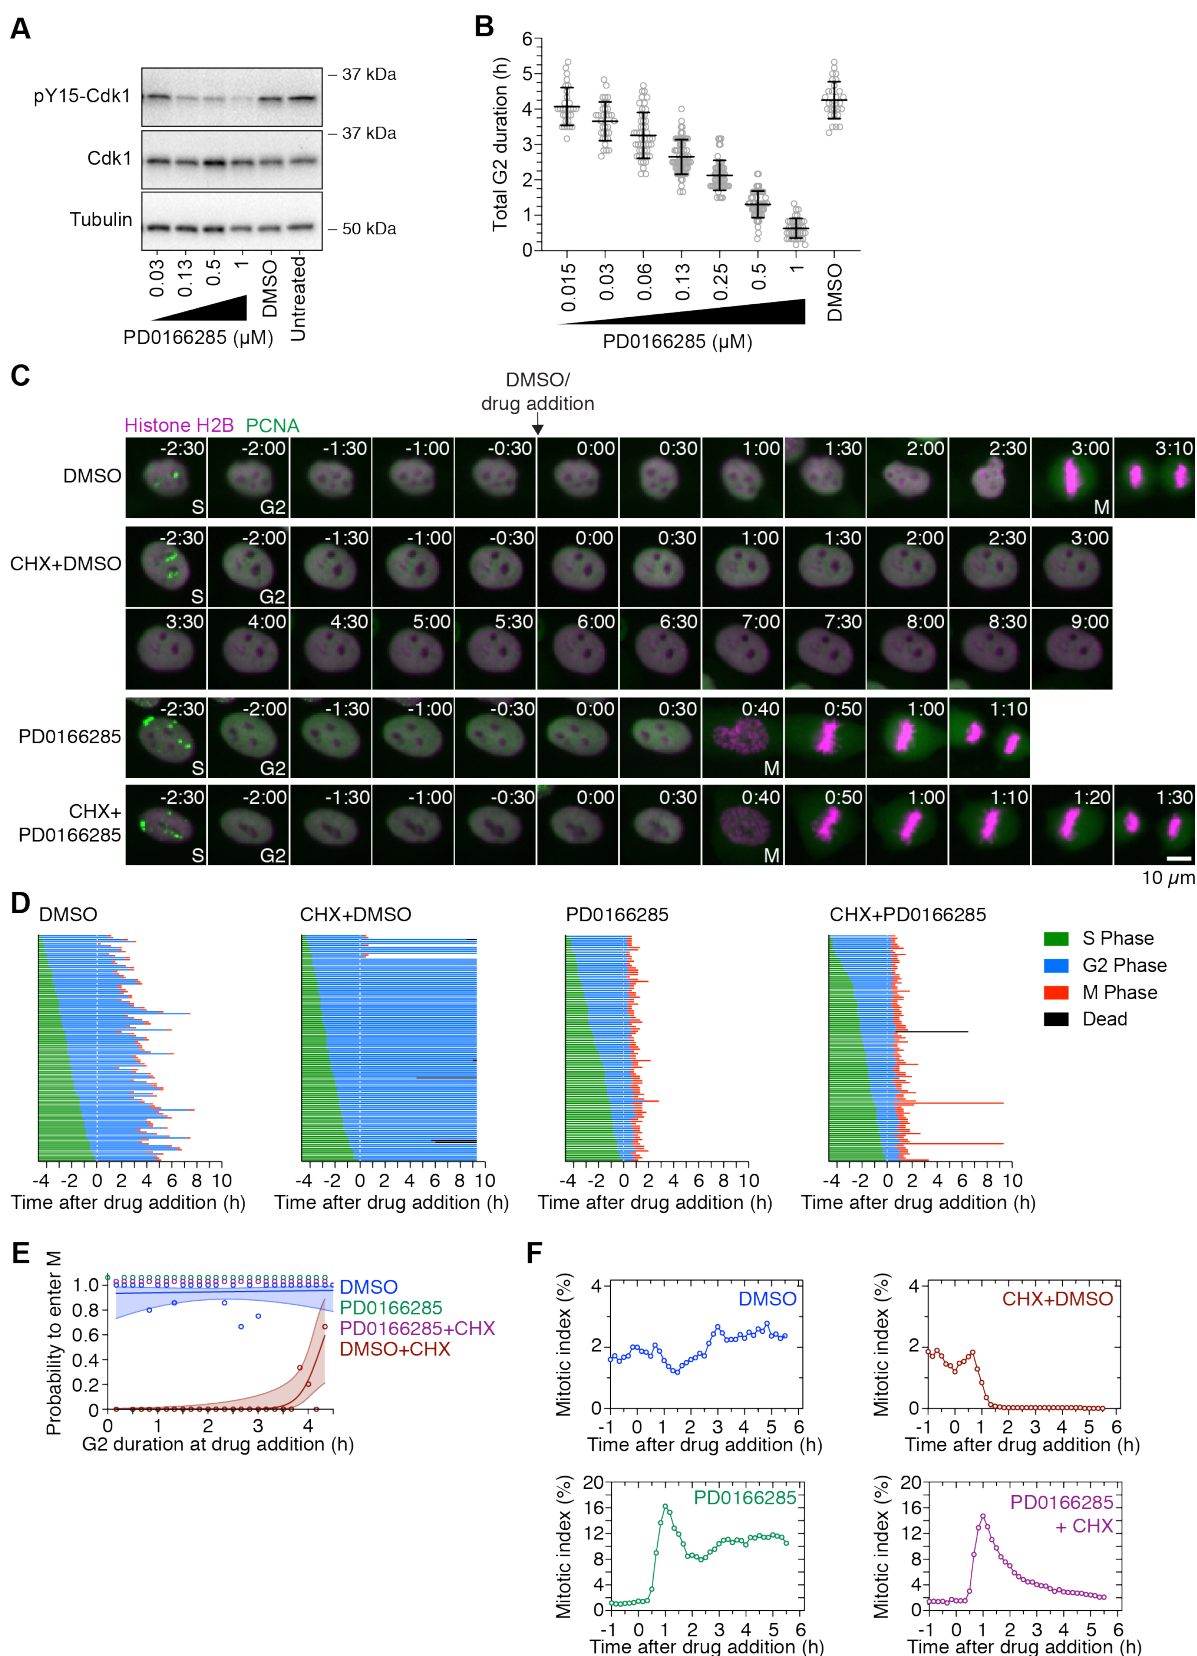

## **Wee1/Myt1 inhibition shortens G2 phase and restores mitotic entry in cycloheximide-treated G2-phase cells.**

(A) Asynchronously growing MCF10A cells were treated with DMSO or different concentrations of the Wee1/Myt1-inhibitor PD0166825 for 30 min and the phosphorylation state of tyrosine 15 of Cdk1 was analyzed by immunoblotting as a measure of Wee1/Myt1 activity. Cdk1 and  $\alpha$ -tubulin were used as loading controls. (B) The length of G2 phase was measured by live cell fluorescence microscopy of cells expressing H2B-mCherry and eYFP-PCNA in the presence of DMSO or different concentrations of PD0166285. Only cells that had not entered G2 phase at the time of treatment and showed a distinct G2 phase were included in this analysis ( $n > 28$  cells for all conditions). (C) Montages of MCF10A cells expressing H2B-mCherry and eYFP-PCNA followed over the time course of the experiment described in Figure 3A. Time (in the format h:min) was aligned to the point of DMSO/drug addition (10  $\mu$ g/mL cycloheximide (CHX) and/or 1  $\mu$ M PD0166285). (D) Cell cycle progression for MCF10A cells expressing H2B-mCherry and eYFP-PCNA and treated with DMSO ( $n=113$ ), cycloheximide ( $n=116$ ), PD0166285 ( $n=100$ ) or cycloheximide plus PD0166285 ( $n=111$ ). The majority of cells treated with cycloheximide arrested in G2 phase, while cells treated with 1  $\mu$ M PD0166825 alone or cycloheximide plus 1  $\mu$ M PD0166825 progressed into mitosis shortly after treatment with the drug. (E) Logistic regression analysis. Probability of a cell entering mitosis as a function of how long the cell had been in G2 phase at the time of drug addition for the experiment shown in (D). Circles indicate the fraction of cells that ultimately entered mitosis for given times of drug addition. The solid lines show the logistic fits for the data and the lightly colored areas indicate the 95% confidence intervals. Note that the green (PD0166285) and purple (PD0166285+CHX) data points have been shifted upward to make them visible. (F) Mitotic indices for MCF10A cells expressing H2B-mCherry and eYFP-PCNA treated with DMSO, CHX, PD0166285 or CHX plus PD0166285. At least 3226 cells were counted for each timepoint.

**Figure 5**

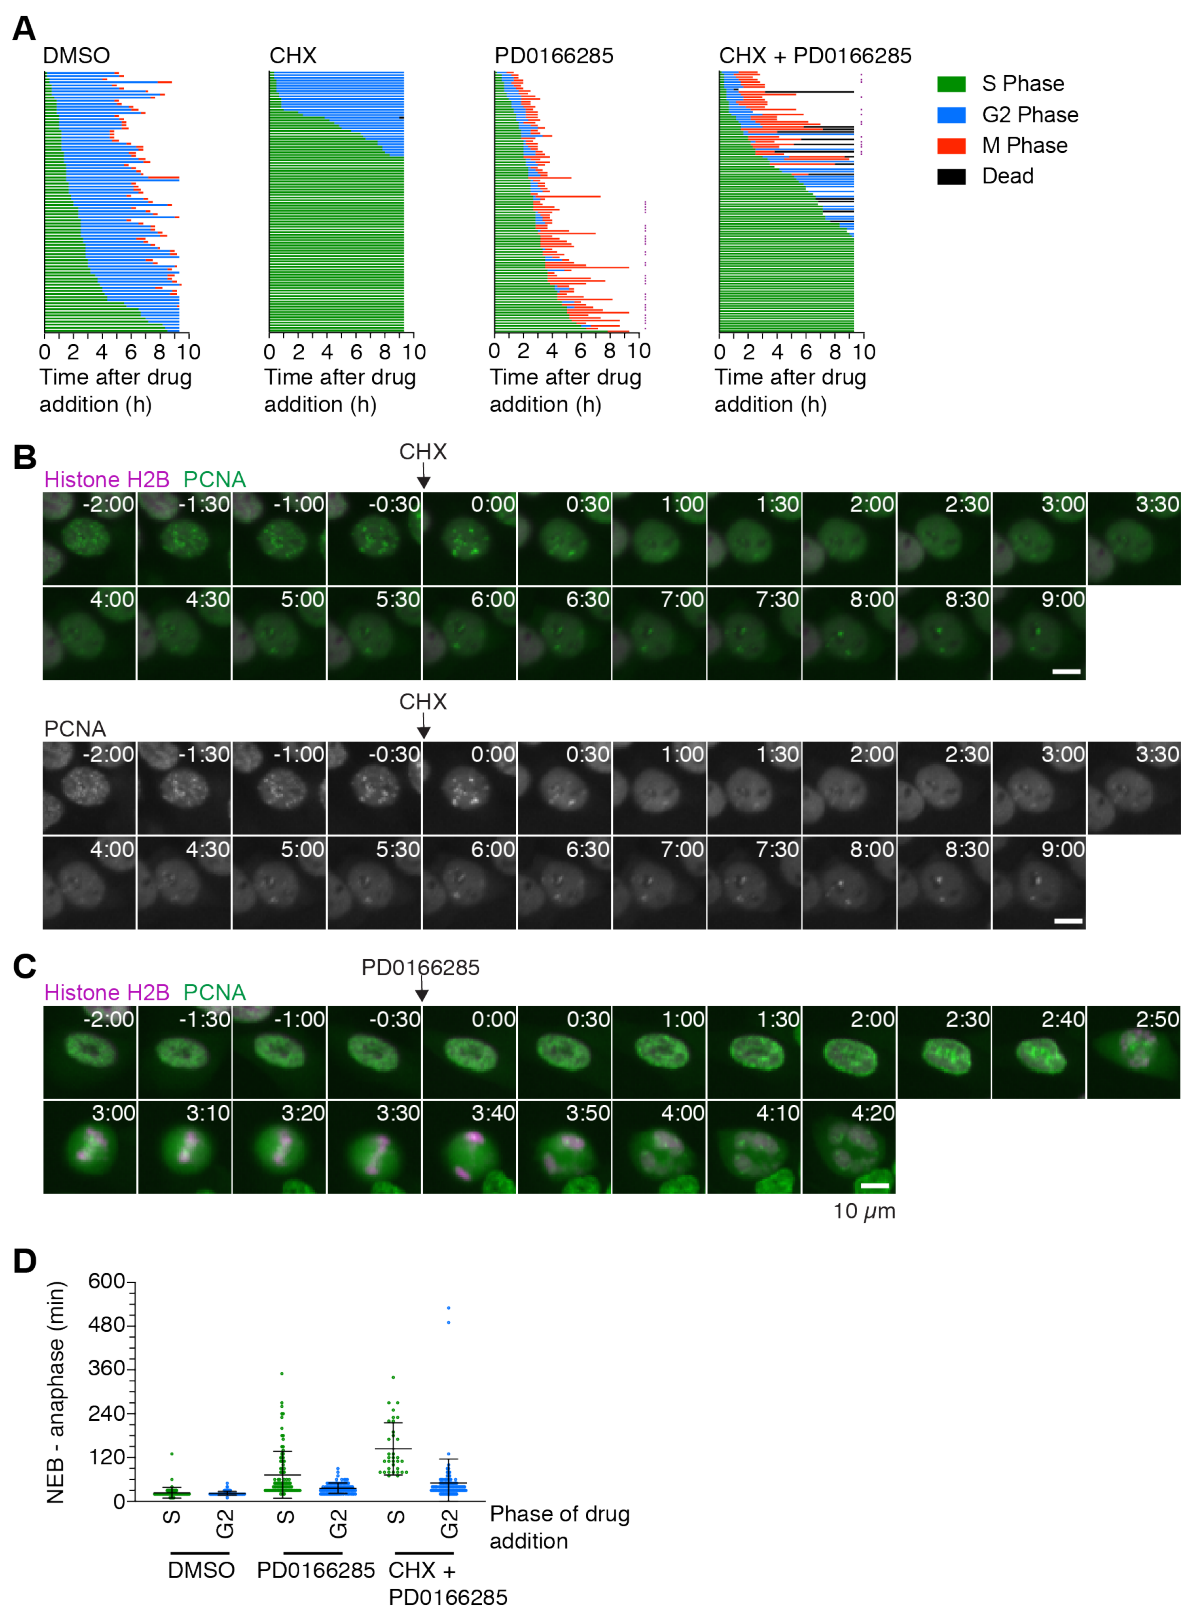

## **Cycloheximide treatment in S phase blocks cell cycle progression even in the absence of Wee1/Myt1 activity.**

**(A)** Cell cycle progression for MCF10A cells expressing H2B-mCherry and eYFP-PCNA treated during S phase with either DMSO (n=85), cycloheximide (n=98), 1  $\mu$ M PD0166285 (n=99), or cycloheximide plus 1  $\mu$ M PD0166285 (n=105). Cells marked with a purple square showed abnormal mitotic progression, often lacking proper metaphase and cytokinesis. **(B)** Montage of an MCF10A cell expressing H2B-mCherry and eYFP-PCNA treated with cycloheximide during S phase. In this cell (and most cells), the PCNA foci became weaker after cycloheximide treatment, yet they never completely disappeared, suggesting that these cells remained in S phase. Time (in the format h:min) was aligned to the point of cycloheximide addition. **(C)** Montage of an MCF10A cell expressing H2B-mCherry and eYFP-PCNA treated with 1  $\mu$ M PD0166285 during S phase that progressed into mitosis in the presence of PCNA foci (suggesting that the cell never completed S phase). Note the abnormal mitotic progression without a proper metaphase and cytokinesis. **(D)** Mitotic duration, measured as the time from nuclear envelope breakdown (NEB) to anaphase, for cells treated either in G2 phase or S phase with DMSO, PD0166285, or cycloheximide plus PD0166285. Whereas treatment with PD0166285 or treatment with PD0166285 plus cycloheximide in G2 phase only slightly extended mitosis (see also Figure 7), treatment with these drugs in S phase dramatically increased the duration of mitosis.

## Figure 6

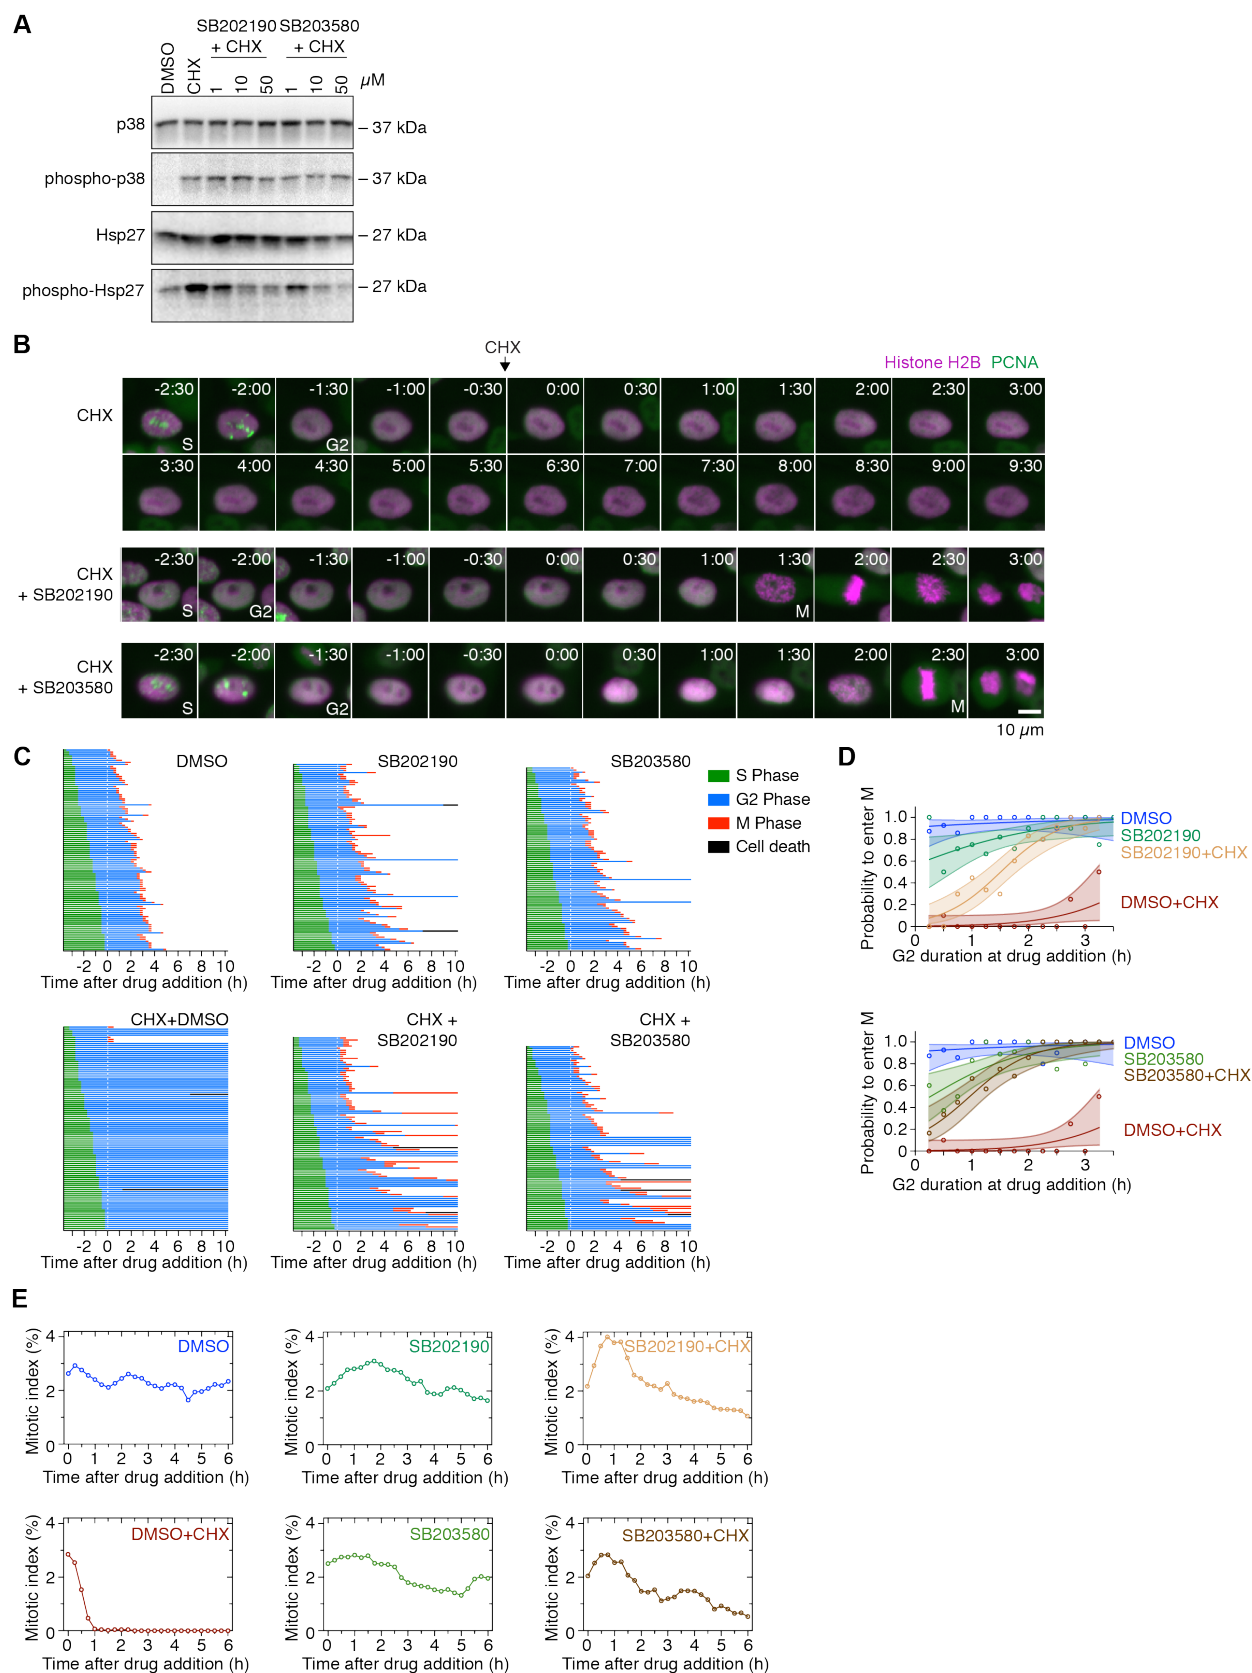

### **p38 MAPK inhibition allows cells to enter mitosis in the presence of cycloheximide.**

**(A)** Asynchronously growing cells were treated for 6 h with DMSO, cycloheximide or cycloheximide plus either of the p38 MAPK inhibitors SB202190 or SB203580. The phosphorylation state of p38 as well as the phosphorylation state of the p38 substrate Hsp27 was analyzed by immunoblotting to assess the activation state of p38. p38 and Hsp27 were used as loading controls. Whereas cycloheximide induced the phosphorylation of both p38 and Hsp27, CHX plus either SB202190 or SB203580 reduced the p38-mediated phosphorylation of Hsp27, but not the phosphorylation of p38 itself. **(B)** Montages of MCF10A cells expressing H2B-mCherry and eYFP-PCNA followed over the time course of the experiment described in Figure 3A treated with cycloheximide or cycloheximide plus either SB202190 or SB203580. Time (in the format h:min) was aligned to the point of drug addition. **(C)** Cell cycle progression for MCF10A cells expressing H2B-mCherry and eYFP-PCNA treated with DMSO (n=100), CHX (n=100), SB202190 (n=92), SB203580 (n=90), CHX+SB202190 (n=95) or CHX+SB203580 (n=91). The majority of cells treated with cycloheximide arrested in G2 phase, whereas cells treated with CHX plus SB202190 or SB203580 (50  $\mu$ M) progressed into mitosis in most cases. **(D)** Logistic regression analysis. Probability of a cell to enter mitosis as a function of how long the cell has already been in G2 phase at the time of drug addition for the experiment shown in (C). Circles indicate the fraction of cells that ultimately entered mitosis for given times of drug addition. The solid lines show the logistic fit for the data and the lightly colored areas indicate the 95% confidence intervals. **(E)** Mitotic indices for MCF10A cells expressing H2B-mCherry and eYFP-PCNA cells treated with DMSO, CHX, SB202190, SB203580, CHX+SB202190, CHX+SB203580. At least 3672 cells were counted for each timepoint.

**Figure 7**

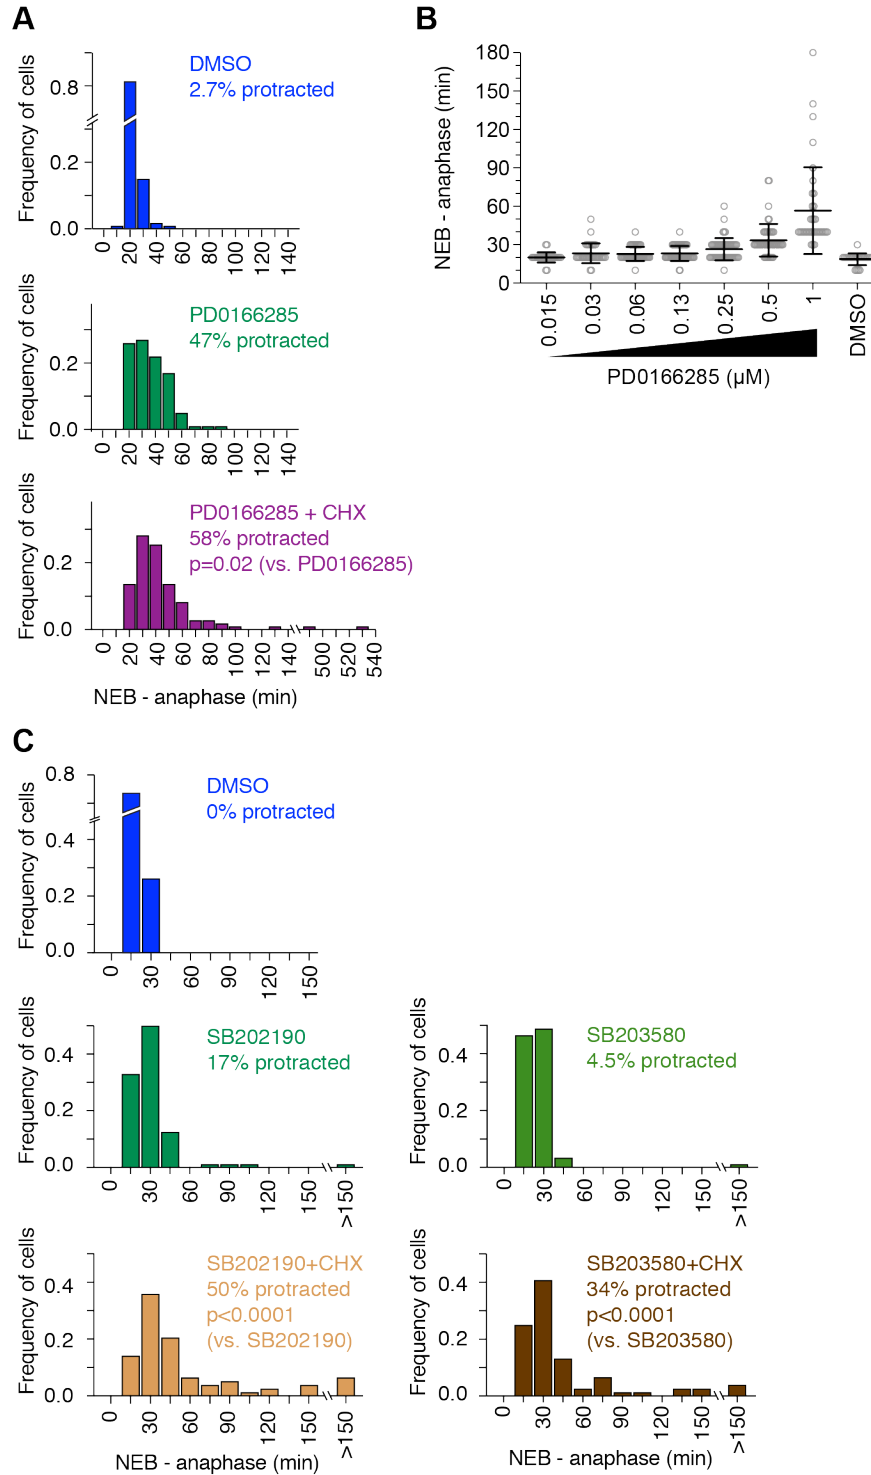

**Protein synthesis during G2 phase is required for normal mitotic progression.**

**(A)** Frequency distribution of mitotic durations (measured from nuclear envelope

breakdown (NEB) to anaphase onset) of cells treated with DMSO (n=113), 1  $\mu$ M PD0166285 (n=100) or CHX plus 1  $\mu$ M PD0166285 (n=110) during G2 phase. Cells were considered to exhibit a protracted mitosis if the mitotic duration was longer than two standard deviations above the average duration of mitosis in DMSO-treated cells. P-values were calculated using a nonparametric Mann-Whitney test. **(B)** Mitotic duration was measured for cells that progressed through G2 phase and entered mitosis in the presence of DMSO or different concentrations of PD0166285. Mitotic duration increased with higher concentrations of PD0166285 (and shorter G2 duration, see Figure 4B). **(C)** Frequency distribution of mitotic durations of cells treated with DMSO (n=99), SB202190 (n=88), SB203580 (n=90), CHX+SB202190 (n=78) or CHX+SB203580 (n=77) during G2 phase. P-values were calculated using a nonparametric Mann-Whitney test.



## Figure 4–figure supplement 1

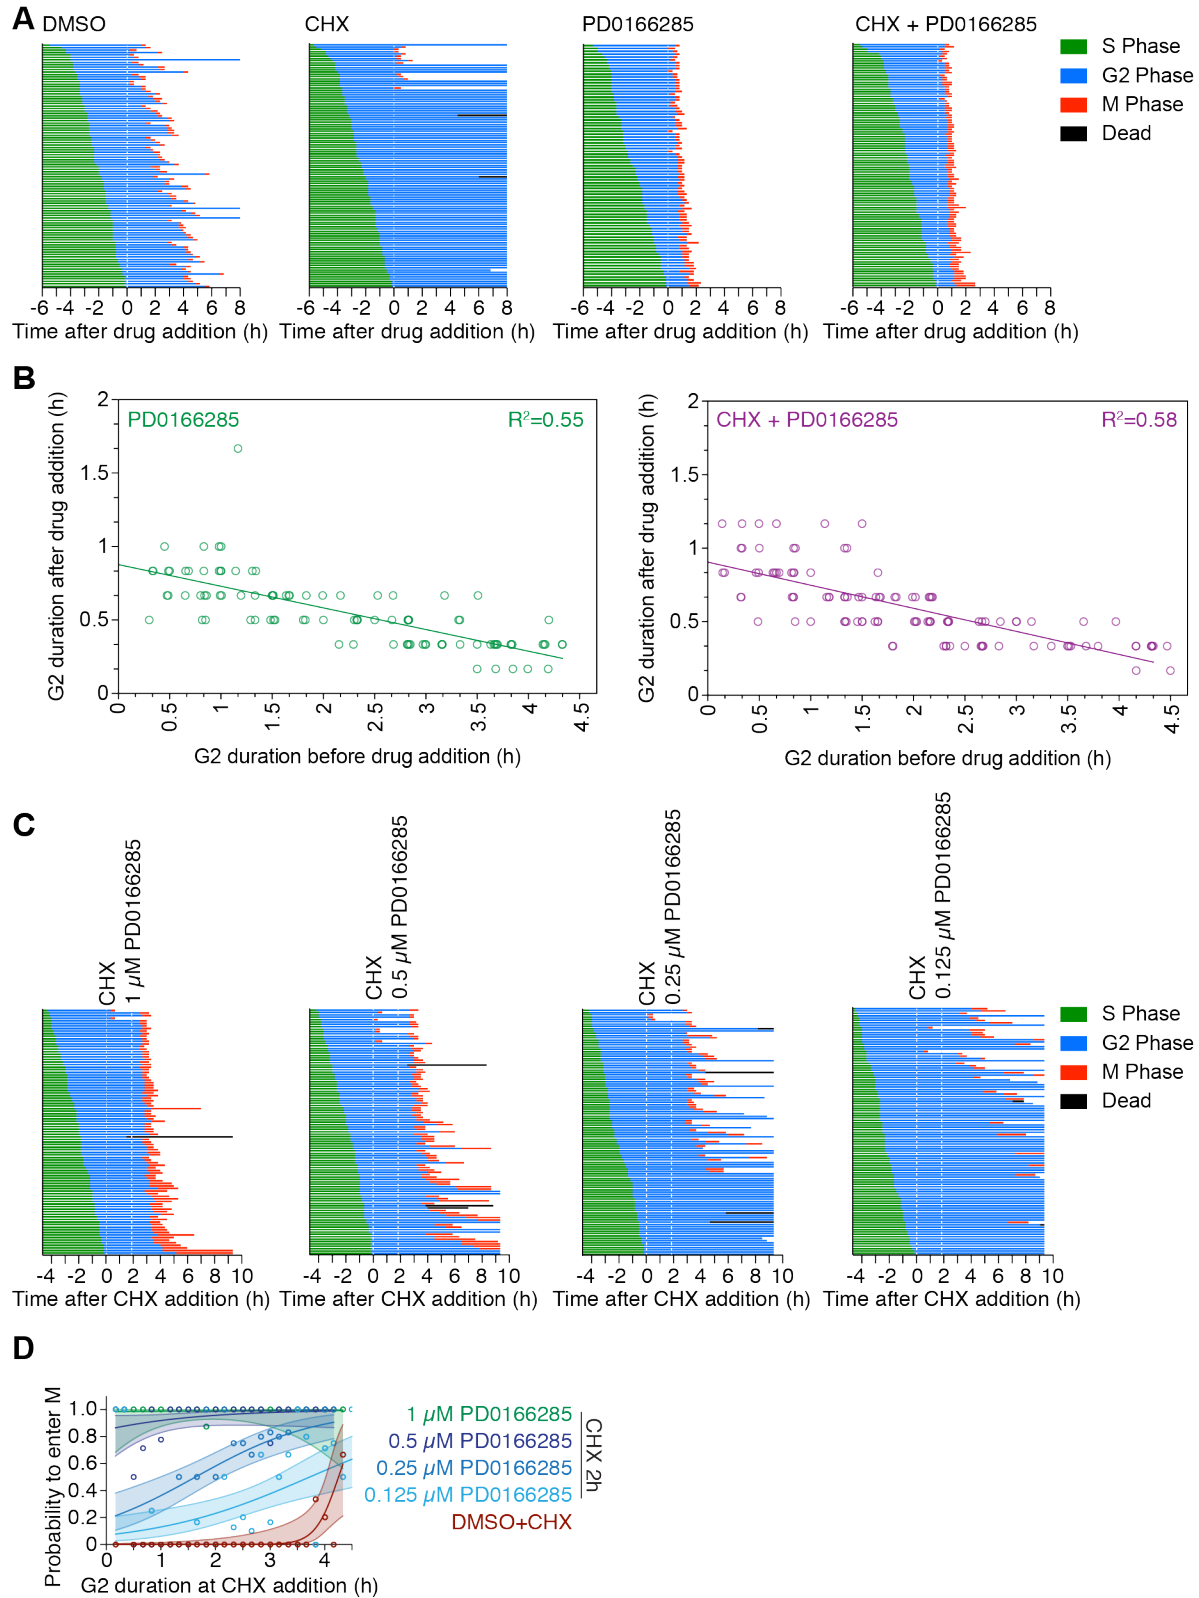

### **Wee1/Myt1 counteract pro-mitotic activities accumulating during G2 phase.**

**(A)** Cell fate trajectories of MCF10A cells expressing H2B-mCherry and eYFP-PCNA treated with DMSO (n=100), cycloheximide (n=107), PD0166285 (n=85) or cycloheximide plus PD0166285 (n=103). Biological replicate of data shown in Figure 4D. **(B)** The time between drug addition (1  $\mu$ M PD0166285 or 1  $\mu$ M PD0166285 plus cycloheximide) and mitotic entry as a function of how much time cells had spent in G2 at the time of drug addition. Cells early in G2 phase required more time to enter mitosis than cell late in G2 phase after Wee1/Myt1 inhibition. Circles show individual cells. In order to better differentiate data points in the x-dimension minimal random noise was added to each data point. Lines correspond to linear least square regression fits. **(C)** Cell fate trajectories of MCF10A cells expressing H2B-mCherry and eYFP-PCNA treated with cycloheximide for 2 h before the addition of different concentrations of Wee1 inhibitor PD0166285 (n= 95 for 1  $\mu$ M PD0166285, n=103 for 0.5  $\mu$ M PD0166285, n=107 for 0.25  $\mu$ M PD0166285, n=104 for 0.125  $\mu$ M PD0166285). **(D)** Probability of a cell to enter mitosis as a function of how long the cell has already been in G2 phase at the time of cycloheximide addition for the experiment shown in (C). Circles indicate the frequency of mitotic entry for any given G2 duration, solid lines show the logistic fit for the data and lightly colored areas indicate the covariance of the fit.

## Figure 6–figure supplement 1

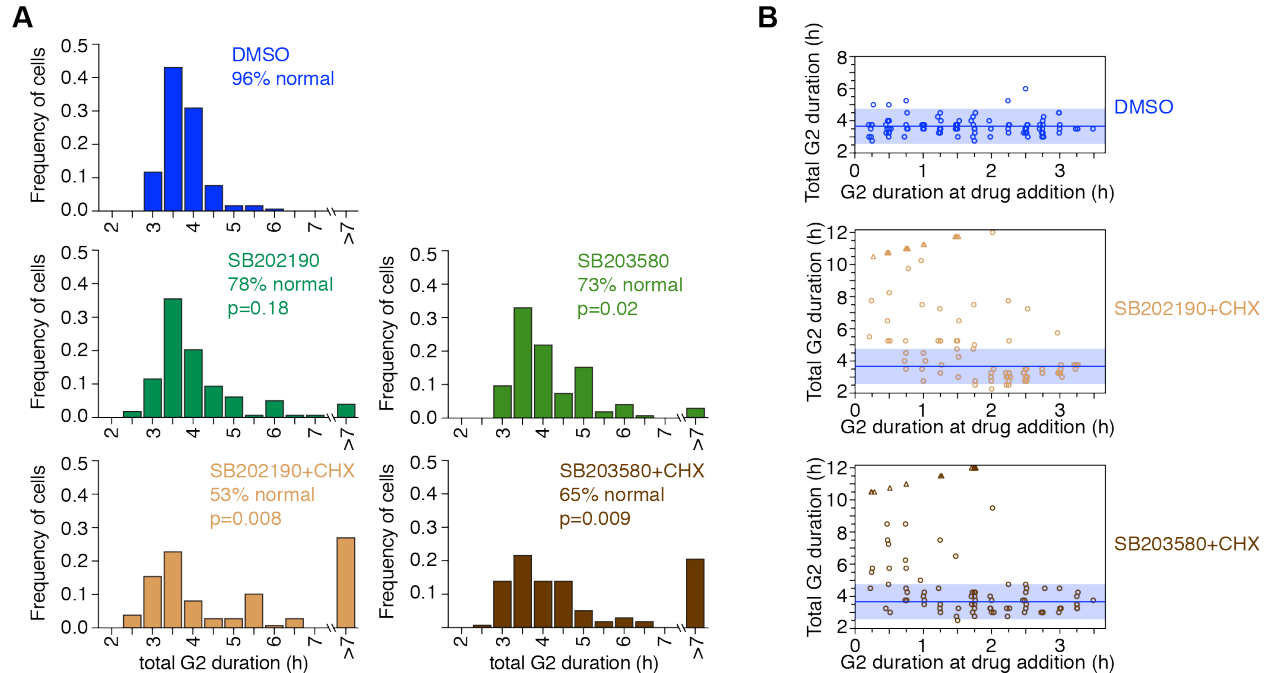

**The majority of cells exhibit a normal G2 duration when treated with cycloheximide plus p38 inhibitors.**

**(A)** Frequency distribution of the total duration of G2 phase of cells treated with DMSO (99), SB202190 (n=92), SB203580 (n=95), cycloheximide plus SB202190 (n=90) or cycloheximide plus SB203580 (n=91). P-values were calculated using a nonparametric Mann-Whitney test. **(B)** Total G2 duration plotted against the time a cell had spent in G2 at the time of drug addition for cells treated with DMSO, or cycloheximide plus either SB202190 or 203580. Blue, solid line depicts the mean G2 duration for the DMSO control and the light blue, shaded area marks the area that falls within two standard deviations of the mean. Circles depict cells that entered mitosis during the experiment, triangles depict cells that were still in G2 at the end of the experiment. In order to better differentiate data points in the x-dimension minimal random noise was added to each data point.

## Figure 6–figure supplement 2

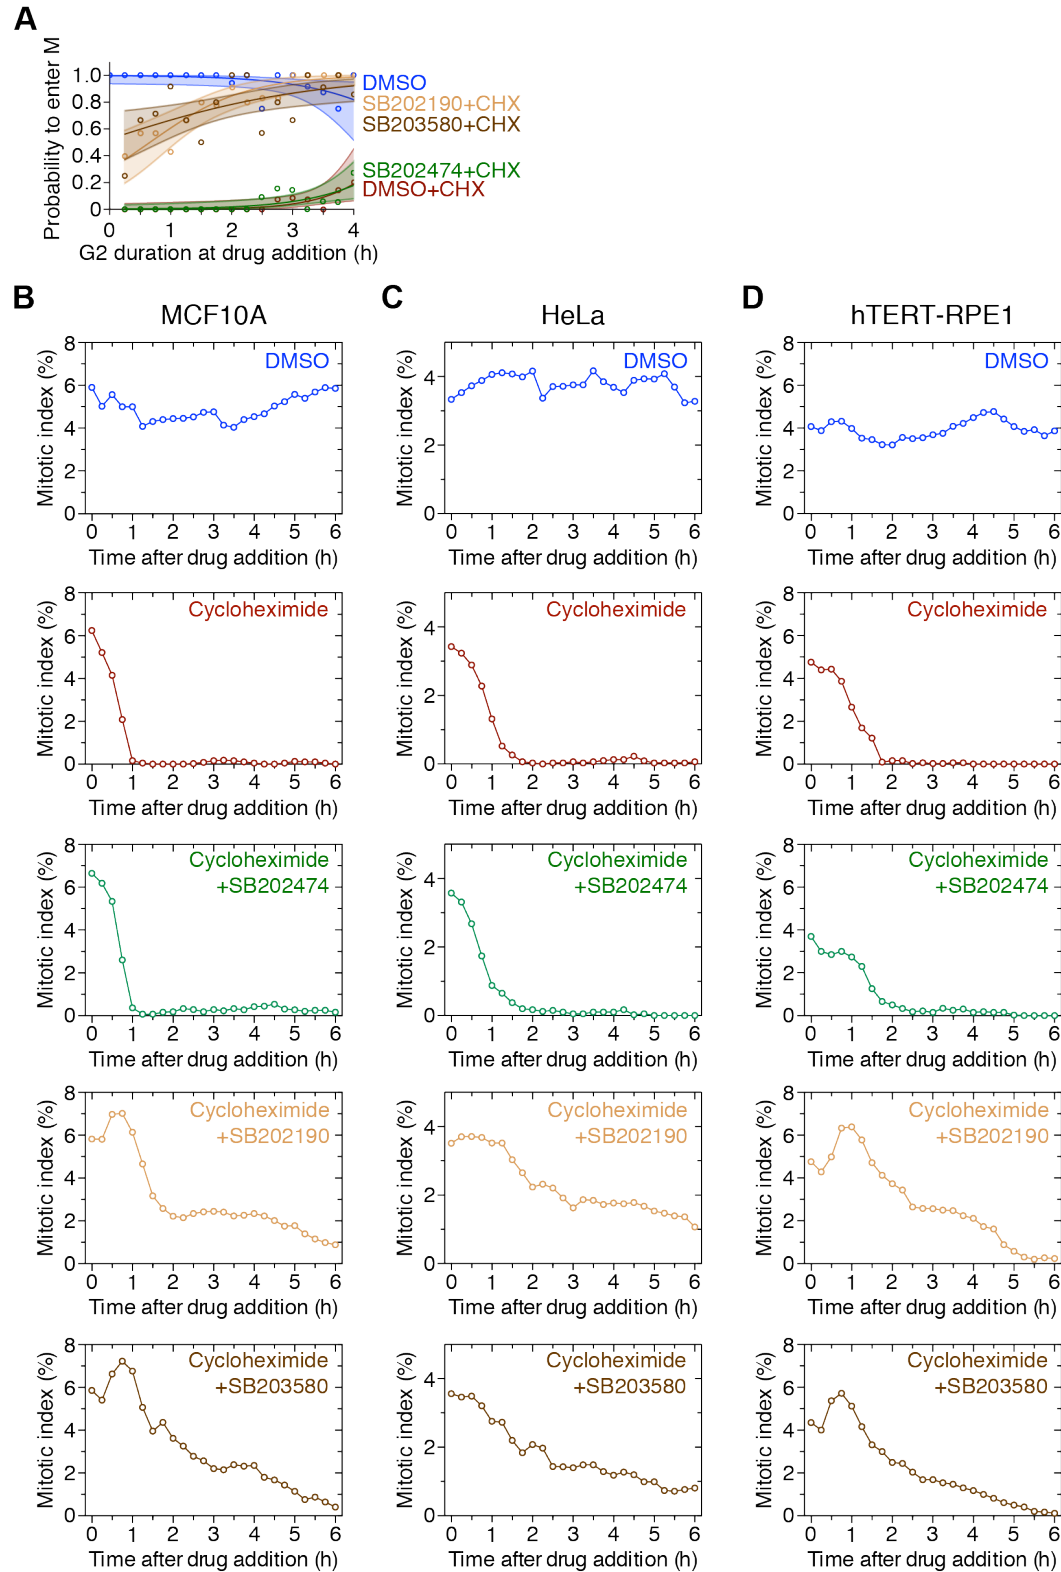

**p38 inhibition allows cells to enter mitosis in the presence of cycloheximide.**

**(A)** Probability of a cell to enter mitosis as a function of how long the cell has already been in G2 phase at the time of drug addition for MCF10A cells expressing H2B-mCherry and eYFP-PCNA treated with DMSO, DMSO plus cycloheximide, cycloheximide plus either p38-inhibitor SB202190 or SB203580, or cycloheximide plus the structural analog SB202474. **(B-D)** Mitotic indices for MCF10A cells (B), HeLa (C) and hTERT-RPE1 (D) cells expressing H2B-Turquoise and eYFP-PCNA cells treated with DMSO, DMSO plus cycloheximide, cycloheximide plus either p38-inhibitor SB202190 or SB203580, or cycloheximide plus the structural analog SB202474. For each timepoint at least 3605 (MCF10A), 3018 (HeLa), and 2506 (hTERT-RPE1) cells were counted.

**Figure 7–figure supplement 1**

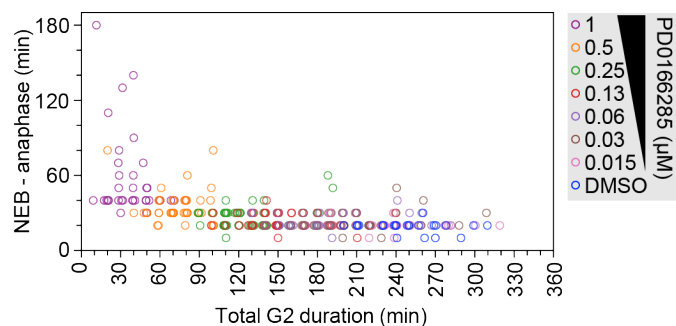

**Inverse relationship between the duration of G2 phase and the duration of M phase in PD0166285-treated cells.**

Mitotic timing (measured as the time from nuclear envelope breakdown to anaphase onset) for cells that were treated with cycloheximide for 2 h before the addition of 1  $\mu$ M PD0166285 as a function of how much time the cell had spent in G2 phase at the time of cycloheximide addition. In order to better differentiate data points in the x-dimension minimal random noise was added to each data point. Note that cells that had spent less time in G2 phase at cycloheximide addition, required more time to progress into anaphase.
